# Supplementary material
Source: publisher figshare collection journal article supplement (https://gsapubs.figshare.com/articles/dataset/_/19783009)
Supplement: Supplementary file 1 [file 1]

## Sheet: Trace Elements
Pamukçu, A.S., Schoene, B., Deering, C.D., Keller, C.B., and Eddy, M.P., 2022, Volcano-pluton connections at the Lake City magmatic center (Colorado, USA): Geosphere, v. 18, https://doi.org/10.1130/GES02467.1.
Note: Not all samples have both age and trace element data
Note: No CL image for samples in blue
						Trace element concentration
Sample ID	Age	2σ	Th/U	Pb* (pg)		Y (ppm)	2σ		Zr (ppm)	2σ		Nb (ppm)	2σ		La (ppm)	2σ		Ce (ppm)	2σ		Pr (ppm)	2σ		Nd (ppm)	2σ		Sm (ppm)	2σ		Eu (ppm)	2σ		Gd (ppm)	2σ		Tb (ppm)	2σ		Dy (ppm)	2σ		Ho (ppm)	2σ		Er (ppm)	2σ		Tm (ppm)	2σ
	(data from TIMS; see individual sample age tabs)
48C
48C L4 z10	23.4158	0.0476945	0.630044	5.39336		2801.88	15.23		480179	227.516		23.2149	0.994608		1.41105	0.0559897		73.4334	0.875562		1.337	0.0629028		11.1868	0.54311		17.4674	0.604898		6.77353	0.264513		85.3049	2.56255		31.755	0.875592		328.848	5.56444		93.9391	2.67145		375.453	9.88318		75.0918	3.53168
48C L4 z11_1						2917.42	42.038		481239	275.528		21.2291	2.54114		0.358176	0.0671541		114.228	1.64892		0.62243	0.0445473		7.66026	0.439453		12.6137	1.39502		1.36813	0.335464		63.6954	2.46838		21.5019	1.56579		254.809	11.4966		95.7882	4.82678		467.747	15.2182		98.9076	4.26848
48C L4 z11_2						2537.87	34.8231		481495	164.497		20.9981	1.1435		0.387757	0.0443925		127.435	2.47278		0.622992	0.0746393		7.27254	0.378347		11.22	0.690647		1.6144	0.0653538		55.0433	2.1468		18.2493	0.972534		215.288	5.2522		83.14	2.1228		404.064	7.38069		88.636	1.71148
48C L4 z2	23.3215	0.037969	0.809251	3.60283		2047.93	10.1972		482732	133.837		22.4682	0.646052		3.64173	0.110878		95.5163	0.995221		1.54483	0.0557825		10.1535	0.556946		11.8224	0.741978		1.12803	0.122506		55.2796	1.5945		17.7556	0.79258		208.976	10.6349		73.7756	1.60517		337.097	7.03403		68.0973	1.87245
48C L4 z4_1						2651.05	39.0257		481888	203.382		27.5866	1.35298		1.93932	0.110918		177.688	4.03297		1.41996	0.1075		11.5135	1.72256		14.408	1.1999		2.63161	0.393358		71.3563	3.13837		22.9504	1.62375		255.626	9.99153		90.5262	4.46433		414.58	15.8528		83.1022	3.11455
48C L4 z4_2						1368.65	21.4684		485962	260.319		10.311	0.63338		0.402341	0.0135403		53.8317	0.964318		0.462637	0.0201247		5.86002	0.211324		8.94995	0.0836536		1.98474	0.0351778		40.0479	0.613838		12.2299	0.182173		134.41	2.92413		47.0342	0.944504		214.688	7.18797		43.076	0.436738
48C L5 z1	23.2724	0.0245913	0.731567	46.3156		2264.06	23.7678		480318	249.98		28.8317	0.907354		1.43397	0.0247065		100.435	1.17367		0.752165	0.00898174		6.24664	0.178199		8.56579	0.181226		0.920917	0.0137515		41.0544	0.599593		13.936	0.564848		169.174	2.4156		68.554	1.54006		362.249	12.8128		82.6532	1.11968
48C L5 z2	23.413	0.150767	0.776636	0.622111		1789.77	32.1942		481383	253.196		46.1743	7.29569		1.23429	0.275278		117.188	2.4371		0.519377	0.0851595		3.71306	0.24375		5.2423	0.992804		0.502761	0.326873		27.3275	3.28907		9.7648	1.84637		135.487	13.9966		53.9796	2.46536		305.407	13.9025		70.6094	6.65564
48C s4 z17_1						3885.76	76.5515		478002	393.959		41.8663	4.84216		4.38111	0.209995		156.95	8.43047		3.29093	0.217654		20.4065	1.78925		21.6751	2.28378		1.74882	0.502525		109.916	6.51262		35.3471	3.7181		400.058	17.0721		138.482	8.74564		627.382	21.6352		124.401	5.00476
48C s4 z17_2						2985.97	36.6326		480691	206.041		37.7808	3.19238		12.7151	0.339944		175.655	2.44552		3.75203	0.126138		19.0678	0.939303		14.0279	1.29878		1.58628	0.119744		64.116	2.32147		21.5508	1.0885		263.664	6.31928		96.3778	1.3953		480.477	5.40211		103.176	2.94707
48C s4 z6						3602.73	86.9129		479183	412.062		35.6008	3.18461		1.63642	0.17542		156.122	3.49083		1.70489	0.17934		13.2185	1.23685		21.1277	1.26559		6.13746	0.382226		99.2964	6.06309		35.5819	2.32676		378.079	11.3769		121.494	7.47829		530.336	10.2877		104.565	4.01403
SPM
SPM L z10B	23.3359	0.0429196	0.5555	23.3872		1653.2	273.891		480900	600.362		26.1355	0.882487		3.09778	0.560798		80.3077	14.8632		0.841423	0.154382		4.88491	0.810826		5.44771	1.1929		0.359429	0.0751652		28.301	4.53129		10.0234	1.75279		128.32	24.8967		50.8227	9.52773		266.071	54.5321		58.7799	10.7307
SPM L z11	23.2879	0.0413316	0.650951	8.83953		1300.26	331.565		482213	195.705		21.9814	0.785788		4.34142	1.10683		82.9263	21.3273		1.2916	0.332219		6.37876	1.62138		5.04708	1.19548		0.516564	0.128595		25.5892	6.70639		8.84244	2.09584		109.89	25.8445		42.3668	10.8462		214.167	53.9424		46.1375	10.9408
SPM L z13						1159.07	17.2975		487206	256.227		6.19759	0.262477		2.27868	0.0516412		50.9589	0.717509		1.10539	0.0120928		8.41407	0.27856		8.64736	0.0693516		1.81974	0.0772236		36.0892	0.781659		10.6726	0.330157		115.562	2.66045		39.9881	0.970327		180.309	5.95502		35.9383	0.725317
SPM L z15	23.3275	0.0369754	0.792766	8.97253		1113.86	274.363		487134	467.194		5.0369	0.168309		3.32569	0.824372		49.4862	12.2307		1.31066	0.322461		9.24346	2.48587		8.60017	2.22474		2.02164	0.533947		34.3843	8.80305		10.1061	2.58176		109.263	29.4537		37.8388	10.0023		173.516	43.9337		34.378	9.26895
SPM L z19B						1768.54	25.6736		484300	180.053		14.3892	0.643061		0.431956	0.01097		100.097	0.815929		0.465811	0.0249734		5.97366	0.148256		9.98767	0.188301		1.40071	0.0772907		47.3353	0.942388		14.9843	0.479844		167.71	2.2122		59.6042	1.6347		271.652	4.82841		55.1505	1.41675
SPM L z3						2934.09	40.3342		480055	189.239		22.1721	1.53503		0.0749142	0.0229537		74.2847	2.13763		0.439932	0.0377194		7.22956	0.283494		14.2868	0.82874		1.10563	0.10707		75.5611	2.57504		23.9269	0.993065		278.485	5.42358		106.398	3.37716		496.677	16.5546		96.9931	4.04022
SPM L z4						1327.9	341.369		485623	614.984		9.0007	0.311559		0.824419	0.226664		65.6405	15.9817		0.611758	0.151935		6.50347	1.46369		8.9653	2.35544		1.60665	0.382673		38.4795	9.86065		11.8478	2.79617		130.62	31.9145		44.9494	11.0413		209.749	51.6907		42.0148	10.2399
SPM L z5						1223.67	133.608		485120	319.535		9.45822	0.482659		1.77827	0.165915		70.5697	7.39702		0.888382	0.102254		7.61873	0.783155		8.84131	0.678791		1.16874	0.151224		38.2263	4.24116		11.1737	1.28417		123.939	11.058		43.3282	5.0168		200.716	21.8176		40.501	4.7798
SPM L2 z12						1558.57	50.118		485736	237.263		8.41687	0.465027		0.762157	0.030748		57.9887	1.54634		0.606728	0.0237749		6.04865	0.274584		10.0937	0.271456		1.97662	0.079505		50.2618	1.01341		16.8082	0.379215		171.173	6.85813		50.8833	1.21458		204.118	6.39233		38.4533	1.38593
SPM L4 z1						1353.6	29.5352		481925	295.657		21.6623	1.2588		0.218857	0.0260485		62.0747	1.54865		0.14998	0.0226454		2.0884	0.419548		4.05836	0.405303		0.240276	0.0889811		21.9272	1.27318		8.09719	0.779248		104.101	11.4332		42.5022	2.18853		230.365	5.41442		51.9089	2.61518
SPM L4 z2	23.3404	0.0973597	0.686064	3.11454		1695.6	26.7774		481680	335.723		26.7933	1.41843		0.153155	0.0203246		74.8678	1.72149		0.182417	0.0265695		2.43179	0.312576		4.33343	0.345542		0.308214	0.0595758		24.2077	0.92862		9.17627	0.206201		119.176	5.42112		51.0027	1.63791		285.614	7.72812		67.0017	2.82052
SPM L4 z20						1388.03	21.7725		482467	184.719		27.5962	0.435855		5.42586	0.113302		87.3152	2.74592		3.24496	0.0801696		15.3838	0.378451		7.86991	0.346195		0.64053	0.0366525		27.7535	1.22751		8.95533	0.295633		110.352	4.16302		42.6642	0.969699		222.137	8.35854		49.9283	1.56736
SPM L4 z3	23.3798	0.0908709	1.26997	2.63358		1471.42	31.5646		486634	134.783		5.37665	0.245577		1.23128	0.0543151		46.3602	1.03416		0.873405	0.0422687		9.12037	0.326912		11.9247	0.289405		2.52914	0.0523412		49.1264	1.31261		14.2461	0.48701		150.454	8.54102		50.9753	1.71105		225.563	6.60119		43.5667	1.33917
SPM L4 z6_1						1438.65	20.6567		482053	271.757		23.3305	0.221421		0.548642	0.0146368		68.384	1.00816		0.27239	0.0136628		2.55195	0.174896		4.42484	0.203677		0.311916	0.0388798		24.6856	0.884016		8.7802	0.110394		113.12	4.89032		45.2593	1.32629		231.374	6.64284		52.2008	1.37154
SPM L4 z6_2						1557.59	27.4648		481311	109.885		24.8747	1.32748		1.39817	0.0456542		67.7288	1.01239		0.61721	0.03334		4.07345	0.214651		4.84509	0.342001		0.317261	0.051708		25.0211	0.560106		9.06827	0.136537		116.164	1.84365		48.1904	1.23306		260.081	4.41757		59.1896	1.9641
SPM L4 z7	23.3538	0.118833	1.08752	2.48951		1052.95	10.0606		487544	136.47		4.74514	0.348779		8.49389	0.0810671		46.7825	0.306511		2.23252	0.0319568		12.3094	0.216251		9.21612	0.0987625		2.04551	0.0283262		34.3859	0.641197		9.88986	0.216368		106.523	1.4828		36.0494	0.969367		163.16	4.60155		32.2165	0.721377
SPM L5 z1	23.3788	0.0383886	0.556486	2.96472		1060.27	18.941		483614	398.813		17.6027	1.02925		0.0290603	0.00429289		51.123	1.05472		0.188671	0.023862		2.78939	0.178515		4.87036	0.299884		0.395998	0.0302167		23.6001	0.950041		7.65819	0.532594		93.8426	2.49493		35.5716	0.886773		179.097	6.46611		38.3404	0.792633
SPM L5 z20	23.2413	0.124648	1.19787	7.98577		3053.91	20.9322		482402	127.281		27.29	1.13119		0.90201	0.0186576		134.857	1.11856		0.906351	0.0105982		10.8565	0.270331		18.8984	0.921619		2.46702	0.0904732		89.6584	0.505484		28.1935	0.930869		309.67	10.5028		105.508	2.33562		464.382	14.7855		90.1959	2.47249
SPM L5 z7	23.3572	0.104517	1.15711	0.829444		1689.15	19.9786		486073	219.024		10.3918	1.38233		0.409183	0.0376473		66.889	1.79881		0.604875	0.0376284		7.78408	0.374414		11.877	0.604681		2.13028	0.125356		52.7751	1.52308		16.3284	0.884254		178.112	9.73865		60.8618	2.8268		275.254	8.87383		54.333	2.54588
SPM L5 z9	23.2525	0.0669653	0.618803	7.46843		1300.63	15.9075		481786	215.838		22.1395	0.846622		2.07847	0.108266		68.0159	1.58194		0.558436	0.0390118		3.19443	0.0695438		3.4001	0.13719		0.269102	0.0330377		18.025	0.740428		7.04135	0.367977		91.9584	1.22441		39.6995	1.89122		220.623	5.07919		52.3331	0.924903
SPM M z3						1024.03	60.5046		484209	332.245		9.4661	0.678459		7.15376	0.336264		61.2808	3.8131		2.18662	0.234402		10.3554	0.518649		5.84121	0.611364		1.43062	0.123882		24.1464	1.46366		7.67866	0.788991		93.0022	4.85454		34.534	3.06567		167.914	12.8033		36.0276	1.78176
SPM M z6						2531.48	183.196		481942	344.568		13.4767	1.47922		19.4136	1.08655		121.559	6.13193		3.36696	0.292404		20.7767	1.86714		18.0838	1.95549		2.91176	0.156634		73.1608	6.87597		21.1472	3.03457		237.04	20.193		80.4308	5.76865		365.701	25.932		72.4064	4.09406
SPM M4 z13_1						1494.83	25.028		481659	356.343		27.2663	0.906164		0.808536	0.025135		68.9696	0.929811		0.343166	0.0205735		2.61623	0.171059		3.70888	0.176122		0.253108	0.0401645		19.8339	0.48916		7.51274	0.399226		100.002	2.70659		43.6363	1.65277		238.839	6.94955		57.9813	1.65528
SPM M4 z3						1840.91	31.545		484702	20.0954		22.1964	2.12677		0.273767	0.0472187		121.441	2.40607		0.427473	0.0359499		5.57857	0.396462		9.91306	0.531099		1.28918	0.243534		52.7	3.97799		17.4406	1.21839		195.495	13.152		67.6348	2.25321		299.15	4.89007		58.5871	0.971712
SPM M4 z5	23.3195	0.0351501	0.632647	5.16922		1443.5	39.1402		482701	179.487		21.8242	0.618194		0.121002	0.0109463		63.4643	0.253606		0.241833	0.0124846		3.51872	0.28771		5.82772	0.264944		0.520151	0.0879		29.2247	0.821856		9.79353	0.682023		119.243	2.88382		46.9707	1.00369		238.968	5.28424		53.5389	1.78488
SPM M4 z6						1800.41	48.4203		476154	367.544		27.9028	5.5285		5.6064	1.10396		75.3783	8.27939		1.41412	0.451421		5.87008	1.28175		6.11503	2.07591		0.758435	1.08198		25.9147	5.63288		11.23	2.77275		119.645	30.7078		49.6009	5.92883		282.504	26.3099		69.389	7.97998
SPM S z1						1529.35	119.629		474278	443.393		30.3525	1.76365		3.01753	0.366489		73.6346	5.18482		1.30098	0.157316		6.16251	0.771534		4.47283	0.510073		0.370797	0.138517		20.5457	2.62781		7.37823	0.8151		102.287	9.74765		45.2714	3.73413		250.866	22.936		58.7533	4.7258
SPM S z10						1595.86	665.103		433144	2258.15		29.8368	1.94663		70.9727	28.4349		241.373	95.6399		23.7202	9.6045		102.93	38.0521		31.5905	13.0618		4.36025	1.79364		57.4791	25.8016		15.0935	5.41079		143.135	59.5094		50.838	22.2531		255.402	107.817		56.1703	22.8535
SPM S z12	23.2724	0.0447939	1.06365	5.66101		2746.46	619.156		476495	1684.56		48.0402	1.52824		4.73213	0.808908		214.148	40.0591		1.22103	0.212229		8.14099	1.38642		8.55098	1.81317		1.00486	0.334136		46.9502	8.52007		17.0312	3.25805		210.865	41.9816		84.5197	17.7645		449.858	98.7771		102.37	23.0255
SPM S z14	23.3133	0.0488196	1.30403	4.44794		3369.58	1016.31		477241	1552.61		34.0914	2.22881		19.7646	5.4533		239.601	64.8416		6.24601	1.82557		34.8414	8.50371		23.5792	6.36348		4.75996	1.32126		86.086	21.7808		26.0664	7.44994		292.494	81.2915		108.574	27.0999		531.102	138.149		111.188	31.4002
SPM S z4						1678.56	127.202		461730	468.115		26.1044	1.98659		5.86872	0.700499		84.1442	6.10031		1.9172	0.0720791		10.7984	0.931645		7.03256	0.328055		1.27346	0.247019		27.3591	3.9526		9.02559	0.80232		119.999	11.2372		50.6953	4.5366		285.939	23.2552		64.6136	6.5997
SPM S z9						2395.51	29.8478		460514	457.752		51.4618	5.64953		31.2856	1.2997		216.915	6.27827		4.87436	0.791782		22.3461	1.81238		10.5371	1.56297		1.90226	0.514968		45.4809	2.18552		14.5584	2.69953		180.161	17.9292		72.4311	2.68799		372.536	27.5102		86.5213	7.52845
SPM s2 z1						1666.74	18.4809		481948	213.981		16.6118	0.98358		0.115995	0.0134617		59.4735	1.18441		0.188499	0.0158233		3.14102	0.436402		6.05123	0.185646		0.43353	0.0849057		32.132	0.647391		11.3182	1.21176		138.617	5.00555		54.302	1.94889		267.494	11.365		58.707	0.75336
SPM S2 z21						1035.12	17.7333		488101	206.678		4.57976	0.671101		0.068408	0.0167411		31.4723	0.320613		0.406176	0.0352334		5.80203	0.353437		8.40642	0.112124		2.30579	0.107788		35.6968	0.792432		10.2376	0.498807		110.136	3.1937		37.3688	0.923745		166.482	3.6361		32.5468	1.59517
SPM S2 z4						2178.32	39.2955		480739	377.114		23.4023	2.24044		0.695734	0.0918416		93.9655	3.6118		0.673299	0.117401		5.6171	0.640226		9.41409	1.14209		0.840042	0.317441		47.053	3.17233		15.9714	1.8157		188.884	8.45912		71.5159	3.04905		364.823	10.149		80.7235	3.89699
SPM S2 z6						1375.85	58.4782		478193	167.131		24.2224	2.01654		3.60695	0.220532		70.0746	3.08281		0.76438	0.100761		4.06461	0.713912		3.9931	0.484473		0.371653	0.136575		18.6836	1.27896		7.08906	0.794712		94.9826	6.66429		40.9368	2.64455		228.684	8.46251		53.3201	4.17194
SPM s2 z8						1537.97	31.3916		479595	472.708		25.3158	6.60795		3.10401	0.644286		70.7301	5.3279		0.57161	0.296878		4.56186	1.33054		4.03237	1.48325		0.353307	0.27815		23.981	8.77709		8.3322	3.71809		114.514	14.4277		45.7393	10.1206		254.433	32.399		60.2855	10.6406
SPM S4 z8	23.2889	0.0478715	0.640072	2.36395		1473.9	29.4136		481942	173.577		20.3244	0.757488		2.92388	0.115909		64.5948	1.59221		1.91387	0.0490087		8.70645	0.500019		4.82544	0.450683		0.359954	0.0374789		21.9959	1.35637		7.88246	0.491484		104.684	3.48555		44.9715	1.02876		248.297	6.75088		58.7691	1.99516
SPU
SPU L z1						1333.04	180.882		481852	490.302		19.2678	0.813548		0.700494	0.0939486		68.6283	9.39359		0.264943	0.0312159		2.17571	0.329042		3.67161	0.480853		0.249977	0.0395178		21.0631	2.67406		7.77353	0.782829		101.189	15.7857		41.0566	6.14635		220.097	32.2368		49.379	6.79699
SPU L z13						1944.1	31.793		484778	217.709		11.4142	0.67354		0.1017	0.014078		79.1379	1.30027		0.515311	0.0224943		7.71376	0.178672		12.1595	0.292482		1.77642	0.0476596		55.1638	0.963593		17.1727	0.263335		191.017	3.12217		66.6803	1.22056		304.291	4.40056		60.0467	1.09637
SPU L z15	23.3503	0.0650845	1.17659	4.08019		1197.49	111.237		486517	181.574		6.35259	0.322991		0.65063	0.0522225		56.2344	5.18805		0.456404	0.0512139		5.80991	0.527309		8.81789	0.835027		2.2379	0.220188		39.3682	3.94934		11.487	1.2151		123.897	12.4103		42.6273	4.59865		190.977	18.7436		37.3631	3.77082
SPU L z20						1207.79	17.0608		486941	139.109		5.40263	0.344867		2.65397	0.0367835		49.058	0.607513		1.22004	0.0337188		9.47316	0.160332		9.82855	0.153657		1.89047	0.0617697		38.6745	0.676721		11.3234	0.272552		122.878	2.85173		42.0798	0.246547		188.114	3.04125		37.0054	0.585769
SPU L z7						714.065	74.1567		487715	147.013		4.33216	0.186171		3.93388	0.395874		25.7695	2.46744		0.587995	0.06197		4.64356	0.526917		5.38212	0.649353		1.63913	0.163627		23.3861	2.66005		7.00525	0.542283		76.9515	7.2171		26.099	3.11174		118.253	12.0721		23.5226	2.36392
SPU L z8						2071.99	246.238		484125	400.823		13.3426	0.343463		3.15331	0.320096		118.476	13.1567		1.42253	0.142713		11.5819	1.32789		13.6614	1.98886		1.95294	0.177531		60.7918	7.5189		18.7017	2.25284		204.945	27.1532		72.2013	9.40355		324.651	41.6682		64.1039	8.28684
SPU L z9						1769.79	445.173		483451	758.797		20.186	0.595981		0.749143	0.159805		111.477	28.222		0.483576	0.111328		4.9156	1.14328		7.27875	1.6337		1.05942	0.282088		36.2275	9.4179		12.1712	2.68397		146.912	35.7727		57.1015	13.902		278.279	64.9275		60.7467	14.785
SPU L2 z5						737.694	11.2161		487715	173.4		5.02918	0.226995		1.41701	0.0447744		33.309	0.352199		0.548274	0.016746		4.38724	0.121456		5.24679	0.220052		1.28039	0.0362017		22.0729	0.547768		6.68966	0.131818		74.0357	2.09064		25.4108	0.466246		116.526	1.48273		23.2185	0.83999
SPU L2 z7	23.2431	0.0302729	1.04801	12.4123		1212.53	16.1017		486352	67.8742		7.29597	0.356577		1.36081	0.0162686		72.0955	0.694513		0.792367	0.0200985		7.1976	0.14635		9.12376	0.115986		1.55925	0.0712308		38.5884	0.519005		11.2165	0.334478		120.776	1.06695		41.8558	0.534772		185.718	2.88649		36.4535	0.980466
SPU L5 z12						2793.31	58.9083		481877	238.447		16.9505	0.71339		0.386852	0.0243055		108.832	0.843102		0.596155	0.0317936		8.43519	0.421002		14.9667	0.635282		1.87469	0.11831		71.2186	2.13764		23.3579	0.914665		267.768	7.71556		96.0547	3.0068		439.58	15.79		90.1969	2.50151
SPU L5 z18	23.3296	0.0823209	1.1928	4.84147		1428.3	24.1795		486775	155.382		5.3872	0.208532		30.364	0.585819		75.7243	1.28687		8.89065	0.215636		40.1304	0.627114		16.4417	0.385289		3.30627	0.0882372		51.1422	0.940849		14.3984	0.41108		152.813	3.40462		49.701	1.34848		216.418	6.21326		41.2415	0.878591
SPU L5 z19						1029.43	45.3618		487090	174.25		6.83328	0.284593		0.190773	0.0163053		44.4499	0.461668		0.315705	0.020192		4.2998	0.10577		6.80071	0.36646		1.52869	0.0692046		29.7439	0.395908		9.24877	0.253186		102.08	1.76463		35.9273	1.11905		165.468	1.29078		34.1423	0.725874
SPU L5 z21	23.265	0.0536797	0.960578	2.41675		2564.74	56.9038		482417	132.725		22.9849	0.483706		21.9432	0.617142		146.425	3.17667		5.93131	0.15201		26.8024	0.80571		15.3826	0.296648		1.78851	0.0653047		64.5537	2.04148		20.8458	0.913273		241.459	4.2544		85.026	3.33027		400.156	7.25615		80.9192	3.20976
SPU M z14						2154.96	400.845		483292	780.343		12.7787	0.761533		1.54022	0.316619		120.068	23.672		1.01435	0.179894		10.2477	2.00533		14.6381	2.63489		2.47496	0.559705		65.5636	12.6599		19.5581	3.59318		212.912	41.2308		73.977	13.9646		328.311	64.8636		64.3673	12.6342
SPU M z3						2347.76	884.484		482502	1471.42		23.1656	1.28634		0.948673	0.299586		122.94	42.9959		0.631094	0.206851		7.2622	2.51694		13.4898	5.05504		1.61334	0.686641		66.6368	22.6267		21.3745	7.78139		242.939	88.3694		83.6979	30.7262		374.873	136.275		72.968	26.5188
SPU M z4						3994.7	25.9144		476975	330.789		59.649	2.48645		1.0883	0.0710695		247.829	2.85839		0.904042	0.0543948		10.8839	0.581502		19.6722	1.56029		1.81903	0.195792		100.452	0.864473		33.4054	1.3643		380.154	16.7273		137.78	2.86002		639.725	22.1378		131.108	8.21273
SPU M z9						1992.57	320.646		479743	545.583		16.3523	0.452562		1.65491	0.208275		112.169	16.2571		0.77086	0.0765976		7.83227	0.906838		11.7171	1.73774		1.54183	0.253373		56.7765	8.14995		18.162	1.93549		203.807	29.8306		71.3998	9.22748		322.133	50.0382		63.2005	7.46662
SPU M z1						2024.95	35.9888		479240	129.441		23.0966	2.40997		2.35807	0.0346398		104.79	2.00745		0.896208	0.0913289		7.82309	0.558767		11.5618	1.02493		1.70186	0.247898		56.7224	2.98025		18.3203	0.816883		205.025	6.37702		72.3152	2.30276		327.066	9.59332		63.7905	1.75947
SPU S2 z1						1175.83	31.1116		484686	169.396		45.0862	1.92625		0.633753	0.0634125		57.0603	1.25576		0.333351	0.0343198		3.59281	0.356836		5.38045	0.350803		1.14148	0.159298		25.5655	1.26756		7.89571	0.571667		95.035	3.47575		36.0525	2.10762		179.029	5.81893		39.0637	2.41688
40B
40B L2 z1						884.207	19.816		481064	217.488		7.4106	0.338635		3.92673	0.0660838		42.4614	0.95732		1.2816	0.0417616		8.45443	0.180477		7.3994	0.212581		1.99778	0.0528046		28.6977	0.811342		8.34267	0.220166		87.9199	2.0783		30.3257	0.897069		134.839	1.94294		27.3157	1.13205
40B L2 z6_1						1105.09	19.6147		486882	125.356		7.92382	0.381831		0.64944	0.0181094		49.154	0.611876		0.440147	0.0189101		4.58664	0.141662		6.81047	0.142706		1.36377	0.0502505		30.5412	0.503878		9.50275	0.250279		106.833	4.60633		37.983	0.581499		173.221	7.00505		35.0863	0.871528
40B L2 z6_2						2418.04	49.0936		483423	128.609		22.2214	1.22498		0.188305	0.028478		139.072	1.78518		0.61834	0.0573772		8.61334	0.659041		14.8216	0.428433		2.26587	0.284113		69.941	4.11345		21.5456	1.71926		241.147	9.80429		84.9525	1.48842		388.641	13.4774		77.7852	2.0089
40B L2 z7	23.3167	0.0291992	0.609425	17.7128		1351.12	24.2827		481576	175.956		18.9492	0.574661		10.0085	0.160774		60.6218	0.658562		0.46325	0.0110617		3.04182	0.115714		3.91392	0.232297		0.300649	0.0238499		20.7684	0.347846		7.49261	0.213498		96.1951	3.3278		40.3532	1.01141		215.413	4.74618		49.8445	1.12451
40B L5 z10	23.2684	0.0723491	0.958062	3.49637		797.934	11.8656		487691	299.881		4.86955	0.199667		1.42278	0.0271202		40.0051	0.346137		0.596483	0.0208784		4.59561	0.103326		5.24839	0.12549		1.28736	0.0507815		22.998	0.407497		7.04546	0.0994126		77.1125	1.109		27.3454	0.557448		125.289	5.60438		25.6832	0.673905
40B L5 z11						728.432	9.98438		488338	157.329		3.84562	0.196523		0.814595	0.022759		27.8502	0.366707		0.452729	0.0291451		4.24186	0.220907		5.43709	0.164546		1.59177	0.0512832		23.1014	0.534138		6.98358	0.320793		74.3552	1.08711		25.9816	0.968485		119.095	2.81876		24.4159	0.768822
40B L5 z16	23.2838	0.0740374	1.11203	3.16684		1777.36	12.6192		483263	65.5538		22.8838	1.4288		0.383721	0.0488893		125.645	1.6719		0.424831	0.0456224		4.83422	0.333089		7.68517	0.532269		1.07707	0.115024		36.5372	0.789069		12.3488	0.920002		149.425	4.56785		58.2357	1.93692		287.142	5.8677		65.4143	1.95444
40B L5 z18	23.2683	0.072369	1.04169	1.29133		1401.12	16.4737		486284	88.4556		11.2078	0.463556		0.918562	0.0734534		69.6864	0.672869		0.660696	0.0679933		6.47407	0.168611		8.95132	0.311023		1.49088	0.168124		41.333	0.773279		12.7383	0.637492		143.778	4.11916		50.7756	2.09312		231.677	5.28793		46.1945	1.19889
40B L5 z19						1333.46	17.37		485459	286.867		12.3663	0.902681		9.11572	0.357504		81.4276	2.41919		2.91508	0.0877001		14.5027	0.457588		9.1609	0.788056		1.5544	0.0515103		36.6621	1.20274		11.5283	0.414874		132.06	1.16486		46.5704	2.12795		222.305	7.24488		45.6283	1.64416
40B L5 z8	23.2058	0.0552592	1.05566	4.78794		973.202	12.926		487571	196.492		5.08679	0.200421		0.159138	0.0069		38.9064	0.557872		0.292418	0.0191318		4.09661	0.0822694		6.50513	0.0594082		1.50852	0.0416483		28.9407	0.449777		8.72183	0.242282		95.7673	3.42424		33.5419	0.508705		151.903	3.44849		30.6911	0.777866
40B M2 z1_1						748.662	44.8072		483479	574.457		13.9406	1.58175		1.7324	0.290093		40.8374	3.48911		0.62327	0.121539		3.68773	1.18781		3.26895	1.05152		0.502443	0.387392		15.616	1.84333		5.68662	1.06739		61.3348	15.8375		25.1407	2.67881		127.716	13.2196		26.235	4.37708
40B M2 z1_2						1530.38	17.5046		484438	156.89		12.2279	1.26279		2.73065	0.10126		81.9997	0.984362		0.789466	0.0376559		5.7831	0.24518		7.70199	0.939824		1.1402	0.223497		40.7917	3.02806		13.0719	0.734744		151.672	3.75281		52.3274	2.53812		251.307	9.59787		51.4581	2.17677
40B m2 z3_1						994.767	20.9314		486994	129.588		6.2821	0.32767		9.77021	0.0899214		60.0688	0.758298		3.47264	0.0426321		18.0723	0.378213		9.86752	0.105646		2.00513	0.0503822		33.9106	0.799675		9.61027	0.382763		102.011	3.08756		35.0227	1.58178		157.175	3.63375		30.7883	1.52388
40B M4 z4_1						1266.28	13.3786		486785	278.59		6.92835	0.829825		0.786449	0.048778		55.0364	0.345141		0.610547	0.0527951		6.72106	0.561298		9.31688	0.641796		1.80645	0.106355		39.4255	1.48489		12.2682	0.806664		128.438	7.27923		45.9348	1.45647		207.268	3.98635		41.0102	0.894823
40B M6 z2						1816.27			484956			11.8545			0.147706			80.1357			0.484445			7.23174			11.3005			1.73048			53.6346			16.2526			187.279			65.354			301.146			59.9466
40B s2 z13_2						750.263	31.6235		487389	334.393		8.56367	2.11601		0.511604	0.162624		35.1011	3.97494		0.307433	0.13002		2.94658	0.465483		3.6755	0.853871		0.925471	0.382483		20.0613	2.53104		7.10323	1.97693		76.0366	10.642		27.8302	2.27283		123.02	12.9901		25.8753	3.74133
40B S2 z17						1418.88	99.4091		481008	531.908		23.6034	1.55844		1.72005	0.158509		64.3014	4.79493		0.674534	0.0660282		4.39614	0.175882		4.8978	0.670082		0.395185	0.0932358		24.5855	2.89199		8.92683	1.08551		111.109	8.37772		43.7444	4.05779		231.411	18.4097		52.3497	4.46179
40B S2 z2						1572.45	26.6054		482751	189.735		15.0708	1.24405		3.7866	0.138589		84.4597	1.67495		1.12703	0.0578729		8.5433	0.377271		9.83227	0.324688		1.6987	0.25275		42.2872	3.38172		13.468	0.887195		148.345	4.03419		54.0999	2.54065		251.913	5.05088		50.6557	1.52266
40B S2 z22						1788.55	24.0652		470031	327.321		45.3924	7.81836		10.6974	0.407778		126.335	4.77064		2.63545	0.33306		13.258	2.12816		10.6333	1.18237		1.45369	0.724726		42.1265	3.40945		14.0671	1.66186		172.389	21.1705		60.4274	5.79696		297.799	20.296		57.2411	3.75479
40B s2 z24						2019.15	40.7258		480345	390.239		25.0132	1.93643		3.88845	0.275358		116.805	4.18255		1.31551	0.0863899		9.6447	0.981501		11.2519	0.394674		1.22024	0.282606		51.2032	1.2306		16.5657	0.488935		185.643	6.75365		65.8363	0.910098		318.465	12.7376		67.2889	2.27361
40B S2 z4_1						2391.94	22.657		483867	98.9614		18.2317	1.27289		0.32226	0.0440481		119.453	3.42677		0.643357	0.0659239		9.56875	0.591326		16.3848	1.36703		2.17782	0.292488		75.8918	3.47462		23.9269	1.26821		252.222	13.1257		86.6141	2.60207		380.563	11.0145		74.0472	5.95361
40B s2 z5_1						2343	38.3255		480577	262.581		29.8434	2.45002		29.0592	0.83004		103.599	1.01599		8.0248	0.372825		33.2287	0.651465		13.1812	0.813081		0.752298	0.12147		49.8715	1.69567		17.0056	1.00092		201.206	6.69781		76.9401	2.42575		380.33	16.679		80.3138	3.08205
40B s2 z5_2						1509.55	122.707		486165	160.658		7.75184	0.222431		17.5478	0.686803		104.94	4.98702		6.6201	0.313024		33.5319	1.66621		15.9847	1.13163		2.56294	0.253945		52.9813	3.58151		15.1132	0.994019		157.805	11.7593		53.8896	3.92761		236.585	15.938		46.17	3.64028
40B s2 z8_1						1493.46	19.2654		485476	240.258		11.7015	0.571913		14.4758	0.0932323		93.6133	0.49802		4.82515	0.0940326		23.6187	0.474716		11.5707	0.425443		1.69751	0.169978		42.4527	1.98333		12.7002	0.649444		147.799	8.10332		53.4437	2.34716		243.803	5.96563		48.8825	1.42885
40B s2 z8_2						1005.63	26.8179		483758	208.826		8.71668	2.19525		1.92077	0.440032		36.4457	1.2267		0.962884	0.459239		4.77166	1.76296		5.45389	1.61444		1.29546	0.76873		26.1048	3.80145		7.7612	3.44626		89.9513	21.8981		33.0682	7.48948		174.508	27.1395		40.7222	6.94278
SY2A
SY2A L4 z12	23.314	0.131934	0.626458	10.5317		1436.27	20.37		482469	319.985		24.6909	1.19982		0.302289	0.0677289		68.1841	1.65527		0.228475	0.0302053		2.46125	0.292122		3.99358	0.529493		0.328852	0.0794961		22.049	2.10313		8.24077	0.890655		107.288	4.33455		44.3946	0.850781		244.592	14.9561		54.8527	1.83071
SY2A L4 z3	23.2483	0.0487994	0.841359	3.74284		1842.86	14.5522		484081	191.778		17.7756	0.571909		0.134497	0.00720462		84.4888	0.730984		0.292789	0.0145397		4.46539	0.153936		8.83902	0.353583		0.940529	0.12418		45.6939	1.02423		15.0789	0.341318		176.05	4.57059		63.3209	2.11029		291.53	5.30103		59.0797	2.53509
SY2A L4 z7						2805.01	72.7915		481384	342.043		23.9912	4.59522		32.0264	1.52265		119.932	5.13971		11.8189	0.650057		52.9182	6.39355		25.5735	3.41504		2.46122	0.509992		84.8824	9.70782		27.9944	4.83029		314.691	29.0155		103.497	5.14934		441.075	15.5879		84.5409	6.7197
SY2A L5 z2	23.2562	0.0426204	0.957308	1.79795		1020.76	17.3328		487539	142.764		5.35086	0.457103		0.165818	0.0222445		36.8651	0.400467		0.340273	0.0200219		4.52829	0.150645		6.76418	0.278474		1.78621	0.0862118		30.2747	0.487168		9.04503	0.298188		99.5208	3.36901		35.097	0.348955		159.229	4.03401		32.2986	0.793544
SY2A L5 z4	23.2786	0.0536767	1.14996	3.79188		1873.28	61.0114		483493	299.697		30.9948	1.11179		0.489832	0.0366275		147.11	3.29213		0.360579	0.0264748		4.52649	0.495336		8.33065	0.646643		1.0746	0.126504		42.6987	2.62887		14.4716	0.391472		174.171	6.65485		65.8155	3.88456		311.88	9.5201		66.1137	2.68113
SY2A L5 z5						1066.71	7.13526		486888	66.4583		10.6413	0.59934		0.278479	0.0375862		55.6831	0.893783		0.277947	0.0276231		3.66617	0.313306		6.19714	0.700448		1.04097	0.108432		28.8326	1.20029		9.15196	0.880878		107.342	3.70134		38.3943	1.52228		179.711	3.89316		37.5598	1.71762
SY2A L5 z8	23.2612	0.0549078	1.11195	2.03913		1092.12			487057			8.75057			1.97602			54.3672			0.892753			7.10044			7.70644			1.73016			32.0557			9.89401			108.803			39.2242			177.853			36.9233
SY2A M3 z4						2606.06	23.7168		482493	223.053		22.2997	1.29679		20.8276	0.363675		156.679	2.05083		5.65209	0.184229		27.7287	0.56881		19.6806	0.511441		2.6611	0.0938797		81.2836	1.62213		24.4362	0.891808		265.983	3.90701		90.0153	2.87593		407.21	5.15529		80.0016	1.56643
SY2A M3 z6	23.2717	0.0614746	0.960318	4.15868		2164.11	71.2465		481023	436.518		26.6911	1.24471		28.2324	1.2994		129.685	5.80618		7.95905	0.501198		34.7613	1.43327		15.7356	0.737751		1.49878	0.183943		60.8513	2.78615		18.3392	1.82825		218.098	11.3707		75.4917	3.07405		341.55	14.6746		68.7182	2.97349
SY2A M3 z8	23.2511	0.0268218	1.10158	15.9897		2217.04	63.9217		482377	428.22		23.6064	1.41438		4.57683	0.0953537		128.918	3.02922		1.60498	0.0783599		10.1037	0.196707		10.2539	0.419834		1.29815	0.0885847		47.514	1.19663		15.6293	0.855716		185.45	9.45068		70.4173	2.57391		348.376	9.21763		74.9312	1.85294
SY2A M6 z5	23.275	0.0311473	0.897191	5.60275		1684.54	34.1619		484001	362.678		21.3916	0.590396		2.86863	0.0907216		100.478	1.64577		1.11897	0.0495965		7.27011	0.309781		8.13753	0.488255		0.83445	0.0671585		40.445	0.934853		13.7716	0.735576		159.558	5.08861		57.0828	1.7023		267.08	8.36469		54.8758	0.569262
SY2A S4 z1						1974.99	18.9986		484871	75.5382		19.3969	1.54512		1.68883	0.0745735		133.109	2.30955		1.18923	0.0620976		10.2889	0.584568		13.6106	0.838418		2.00982	0.162328		62.5925	1.78833		18.9857	0.722234		211.433	5.63275		71.9696	0.989305		321.104	8.81764		63.9194	2.26929
SY2A S4 z2						1065.55	19.6783		487508	199.133		5.33793	0.637487		0.87031	0.0881933		38.6819	0.471438		0.51696	0.044352		5.6674	0.219861		7.67257	0.489133		1.93655	0.132709		33.5823	1.19912		9.80553	0.316722		108.017	3.32137		37.7239	1.50184		174.148	5.91773		35.2904	1.07434
SY2A S4 z5						3035.4	35.8133		481859	436.297		33.0943	1.7598		0.428893	0.0760511		175.767	3.99146		0.724966	0.0735447		9.5938	0.732407		16.4886	0.567718		1.9225	0.247962		86.3621	4.08752		27.5309	1.57552		303.774	19.4741		109.125	4.17784		497.646	12.7654		98.2323	4.24817
10B
10B L2 z6						1030.42	202.903		487087	227.273		4.43837	0.297326		4.35969	0.945078		38.7699	8.08763		1.61311	0.330091		10.801	2.41657		9.47547	1.78821		2.69366	0.566071		35.4675	7.32779		9.88703	2.18616		103.867	21.2674		35.3876	8.38048		156.439	30.162		30.4097	6.49927
10B L4 z13	23.3515	0.0783167	1.06757	1.37655		1445.5	52.2926		486778	242.936		6.16108	0.419018		0.339699	0.0247797		49.427	0.674879		0.70178	0.0395315		8.5369	0.414311		11.6748	0.21386		2.6588	0.128105		48.7271	1.45171		14.3605	0.445551		151.326	3.87903		51.3314	1.80612		227.663	5.24901		42.7762	0.842454
10B L4 z17_1						1805.7	26.3358		481553	193.201		24.9777	1.77169		0.22582	0.018156		89.1035	2.0702		0.309951	0.0472676		3.46535	0.563327		5.74068	0.369852		0.517542	0.0875903		29.1921	1.45583		10.4223	0.833643		136.586	7.77697		56.7184	3.60948		299.243	5.20068		67.8144	1.39804
10B L4 z6_1						2090.94	11.3758		484299	273.602		13.2256	0.55663		0.74145	0.0267457		105.594	1.00389		0.743541	0.0328902		9.25047	0.23483		14.7971	0.521524		2.16959	0.0775337		66.8632	0.861396		20.2051	0.756634		217.509	6.90222		74.5268	3.20382		328.807	5.05861		63.5854	2.21489
10B L4 z6_2						1543.87	47.3008		485305	145.022		17.333	1.20577		0.210812	0.0344341		110.994	1.22567		0.401374	0.0247627		5.1823	0.460341		8.77244	0.685731		1.27711	0.12875		44.4095	0.650102		14.0235	1.10605		157.657	5.61459		55.8774	2.26131		253.927	6.33418		50.3522	3.10204
10B L4 z7_1						1430.22	17.6556		485632	192.804		321.465	21.0355		0.507005	0.133605		46.0908	1.24876		0.769895	0.156416		8.31697	0.626029		11.7958	2.33651		3.33742	0.780494		48.0728	3.33701		15.0785	2.47578		151.413	6.54868		49.719	4.49497		215.082	9.67102		42.1117	0.987634
10B L4 z9	23.4808	0.0902156	0.947613	0.899118		996.236	5.08087		487353	115.81		4.7818	0.585217		0.297369	0.0333166		36.2543	0.321249		0.511916	0.0366078		6.18555	0.16488		8.90613	0.462092		2.24902	0.132731		36.2104	0.695531		10.4883	0.628568		109.072	2.82538		35.6642	0.901556		155.369	4.95193		30.3687	0.857526
10B L5 z2	23.2529	0.0287217	1.03464	18.5212		1780.01	35.483		483609	270.026		18.3754	0.219948		2.74337	0.0678705		112.54	2.64244		1.11498	0.045418		7.8379	0.174856		9.03935	0.27096		1.38467	0.0443548		41.3368	1.20025		13.296	0.543605		154.969	5.91368		56.983	1.64797		279.198	10.5851		60.206	1.85963
10B L5 z3	23.2677	0.0687477	1.0835	2.59288		1746.87	51.7004		485385	308.49		13.2193	0.671973		12.6367	0.250564		91.9584	1.46075		3.8417	0.120068		19.3739	0.778401		13.4822	0.228314		1.3511	0.192561		55.362	1.06466		16.9399	0.669355		185.848	6.98004		62.4003	1.52273		279.349	12.838		53.9111	1.10911
10B M3 z1						1008.7	14.5297		486884	215.74		6.88916	0.541398		7.55539	0.132418		62.1189	0.960072		2.57273	0.0232037		13.4643	0.243824		7.64778	0.158632		1.40391	0.0558296		28.9738	0.571553		8.72045	0.249651		95.9443	2.0968		34.0789	0.385158		157.862	2.24928		31.818	0.351961
10B M6 z1	23.2817	0.0441837	0.731213	2.83217		1520.77	15.9917		482213	256.43		28.2363	1.37207		0.156126	0.0374656		83.7656	1.42439		0.239792	0.0189622		2.75494	0.210474		5.20875	0.266821		0.433742	0.0557357		28.5463	2.0708		10.303	0.873849		125.899	4.20621		50.6707	1.5059		252.958	4.6201		56.4848	1.82839
10B s4 z5						1628.59	77.4907		484160	524.445		13.909	5.03881		5.54699	0.700767		87.0653	7.22391		4.15837	0.363846		19.778	3.57588		11.3025	1.45793		1.60967	0.74861		43.8367	6.1711		14.6033	2.03088		151.444	14.5276		52.7744	4.41412		260.483	10.6233		52.6257	5.07927
1C
1C L2 z6						1219.52	17.6426		486581	268.432		9.07645	2.82666		0.52493	0.0587364		69.3066	2.98848		0.419715	0.122701		5.16251	0.985923		8.46792	1.23197		1.47999	0.371058		36.5569	2.82322		11.0105	0.53727		126.647	14.2781		43.9728	5.63876		199.471	11.1881		40.739	1.29824
1C L2 z7						1889.94	180.911		476674	343.764		30.8315	1.17187		10.4558	1.10245		90.1752	8.72587		1.79007	0.182574		8.12306	0.945555		7.08034	0.962217		9.45204	0.649907		34.6816	3.71118		12.2574	1.7712		148.94	20.3181		59.0479	6.47617		300.768	35.5829		65.871	7.69242
1C L4 z1	23.287	0.0256817	0.784928	7.03428		1673.87	30.9516		485969	131.992		9.03961	0.366644		0.209497	0.00882287		65.6922	0.943709		0.586155	0.0291554		8.001	0.226546		12.5601	0.325092		2.65303	0.121991		55.8221	1.98396		17.1823	0.171704		182.938	3.3172		61.6029	1.46748		268.323	7.34632		52.6529	1.43135
1C L4 z11	23.2916	0.0352929	1.07421	3.67135		1806.96	22.4743		482108	373.924		23.8953	0.685742		1.57156	0.0428723		90.9662	0.622809		0.662259	0.0436688		5.63033	0.236083		8.0902	0.232842		0.822058	0.0433164		39.237	0.442087		12.7588	0.488811		153.089	3.59672		57.0393	2.27		285.913	7.57753		63.3624	1.40396
1C L4 z16						2115.62	14.3567		484219	187.486		19.7041	0.819036		0.367327	0.0211995		139.667	0.860375		0.659459	0.0464936		8.89357	0.40256		15.1132	0.393695		2.36855	0.175785		70.0478	0.978953		20.9671	0.499295		229.598	2.89609		77.5605	2.54789		346.793	6.91944		66.9251	2.89346
1C L4 z3						1047.2	21.8734		487258	256.342		5.57638	0.237818		4.35386	0.0529353		45.3024	1.0029		1.61683	0.0681831		10.5706	0.28178		8.76289	0.194637		2.15906	0.112275		34.4957	0.645401		9.70378	0.1969		106.633	4.33603		35.941	0.883338		162.117	6.62642		31.7727	1.12331
1C L4 z5						1065.32	18.1959		486535	177.46		9.50961	0.503852		3.0205	0.102063		67.1269	0.93485		1.34885	0.0276235		8.13424	0.544576		7.04301	0.344204		1.02037	0.112335		30.3179	0.971885		9.58702	0.191914		108.866	2.12744		38.6286	1.00947		177.821	4.79593		35.751	0.332682
1C L4 z6	23.3996	0.0411031	1.01735	4.31004		2770.87	30.7198		480962	132.499		40.838	5.1343		0.273749	0.0460656		180.771	5.36521		0.873644	0.0312673		7.05646	0.594286		10.4457	1.40095		1.3536	0.136057		54.0517	2.26944		19.2808	1.79053		228.821	8.59113		88.9419	2.42424		455.483	12.462		99.3881	1.37213
1C L4 z9						769.895	12.6408		488309	366.586		4.6477	0.508665		0.277638	0.0255895		34.8182	0.587269		0.364471	0.0168356		3.78526	0.126453		5.44941	0.0994917		1.31152	0.0888699		23.7307	0.94923		7.20921	0.468615		78.274	4.74914		27.7653	1.14874		125.299	5.03911		25.8582	0.83587
1C L5 z1	23.2578	0.0619631	1.0289	3.61749		937.982	35.9693		487519	140.327		5.84594	0.169835		1.67393	0.0750375		44.3792	1.33996		0.763902	0.0356715		5.91958	0.196907		6.6956	0.218024		1.71919	0.0365414		28.809	1.32893		8.60765	0.284615		93.984	4.18149		32.176	1.08737		144.53	6.54719		28.3387	1.10729
1C L5 z4	23.2773	0.0422287	1.09494	2.77716		1453.74	20.9861		486373	202.153		6.87572	0.168788		1.92719	0.0349352		57.9083	0.684354		0.975003	0.042759		8.51722	0.219094		10.963	0.409443		2.51567	0.104682		46.7626	1.24585		14.3593	0.494712		151.004	4.11249		50.4987	1.73826		221.501	7.57649		43.6887	0.540896
1C L5 z5	23.2225	0.0780993	0.904848	3.97089		867.354	15.1658		487764	125.75		4.19632	0.166524		16.3794	0.190757		51.3118	0.508581		5.49165	0.0508317		25.4582	0.344057		10.3898	0.233684		1.88273	0.0288824		30.3675	0.368073		8.50726	0.308818		88.9312	1.61767		29.9998	0.539385		132.724	3.05013		26.164	0.287745
1C M2 z2	23.2027	0.117086	0.792982	2.47385		1146.22	25.9189		482094	156.69		17.4422	1.51806		10.6759	0.28218		79.0483	0.928841		2.12328	0.145136		11.2167	0.61745		7.68518	0.917593		1.50961	0.227567		33.0193	3.93561		9.70769	0.837233		111.775	2.64188		39.6629	2.27684		181.449	7.01872		36.644	0.940758
1C M2 z5						883.475	45.3123		478826	374.257		23.9697	1.36281		31.7365	1.95092		81.6858	3.83735		7.91708	0.531044		29.8295	1.6656		8.38426	0.827416		2.28463	0.292818		30.9336	1.89878		8.47154	1.44856		86.7005	9.75302		30.7202	1.03835		136.679	12.4758		27.5347	3.87412
1C M4 z2						2261.44	29.3053		483317	253.661		18.6233	3.13661		8.79935	0.150231		108.464	0.941257		3.3227	0.205465		18.7024	1.0564		15.004	1.63427		2.19803	0.306017		62.2963	3.20409		19.5051	2.74397		222.449	20.9199		79.1821	4.18675		370.617	17.4725		74.2781	4.29104
1C M4 z5	23.3625	0.0962482	1.00418	1.10307		3190.66	21.9181		481044	139.337		34.3819	3.14921		4.00201	0.453127		145.851	3.88071		1.85487	0.243529		12.4239	0.855619		14.6466	1.66975		1.78284	0.567824		68.1034	2.26813		24.7465	0.806091		289.481	17.2606		108.523	5.78539		523.318	27.3045		108.671	3.57811
1C M4 z6						1488.69	18.4324		482030	277.693		33.239	1.6407		0.672838	0.0991674		77.7592	1.21826		0.368715	0.0505978		2.80618	0.123461		4.19362	0.581023		0.437599	0.106979		21.1807	1.5417		8.4138	0.629046		108.514	8.71694		45.7592	2.0863		254.024	10.1252		59.2892	2.28415
1C M6 z6	23.3363	0.148923	0.99175	1.03368		2291.6	37.0684		481826	148.569		25.7825	2.85749		0.594879	0.120183		135.223	2.82281		0.523804	0.159376		6.5142	1.55111		9.95543	1.2		1.13641	0.449413		45.9264	6.48806		15.0544	2.40898		193.38	16.4117		71.9478	7.89099		370.998	13.9366		86.9106	3.7486
1C s4 z2						2472.37	47.5673		481245	508.712		35.0444	6.02679		7.84946	0.927974		160.379	3.76329		5.41554	0.956167		27.1467	1.79867		17.7945	3.72772		2.64058	0.325877		73.697	7.38274		22.1348	3.3002		257.476	36.1887		88.1369	3.98638		401.365	25.7955		80.2957	7.42587
1C s4 z3						1201.83	3.37144		478484	639.307		65.5026	6.77989		42.9959	1.86914		153.818	2.9713		25.1365	1.65729		99.7964	7.43543		17.8629	4.11062		1.68958	0.400972		26.9454	3.34986		8.6926	2.01004		111.754	18.3518		40.0262	6.20439		200.925	12.8344		45.6191	6.34132
AGQM
AGQM L z3						915.977	342.516		483553	492.262		10.048	0.750971		2.22705	0.775764		53.5539	17.8881		0.68101	0.263142		3.80857	1.30894		3.85536	1.1869		0.914105	0.249837		19.5215	6.39654		6.71184	2.43177		80.5007	27.8513		31.261	10.8581		151.709	52.5143		32.3258	11.1069
AGQM L z7						1138.86	173.13		484706	216.311		7.23957	0.363089		15.6045	2.30091		105.568	15.2177		4.81313	0.735123		20.9441	3.17076		7.90997	1.1842		1.33726	0.201758		27.2731	3.97365		8.47565	1.17318		97.1252	14.8185		36.2243	5.0068		178.111	25.6916		38.4987	5.55487
AGQM L z8						1598.47	472.261		482265	676.975		14.9767	1.29645		7.73011	2.23593		105.111	31.4236		2.30706	0.652255		12.7566	3.77731		10.4784	2.95499		2.35082	0.701082		43.0924	12.8968		13.5245	3.82998		152.686	42.4278		54.6344	15.7833		254.755	75.0046		53.1636	14.4453
AGQM L2 z3	23.1915	0.0503988	0.877052	5.81995		1292.53	97.3237		480755	205.435		15.6372	0.204489		10.9905	0.812266		83.6762	6.15786		2.57562	0.214146		12.0108	0.965458		7.5511	0.448953		1.81653	0.166942		31.3345	1.86059		9.88351	0.569636		114.913	8.15856		42.1402	2.84466		203.952	16.5824		43.0495	2.84474
AGQM L2 z4	23.2073	0.0626221	0.751744	3.28641		1303.27	51.2069		484034	243.073		9.33444	0.622637		1.20269	0.0910132		53.5912	1.66843		0.429112	0.0278696		3.98229	0.188327		5.9955	0.298118		1.5614	0.0618629		30.1692	1.24209		9.98658	0.49761		114.678	5.62219		42.5118	2.19962		204.533	3.27522		43.2215	1.94486
AGQM L2 z9						1285.99	180.712		484628	268.764		8.03634	0.100949		3.95633	0.596096		71.1284	10.8888		1.37126	0.203504		7.75519	1.06348		6.56511	0.884373		1.51382	0.240623		30.5356	4.21349		9.8261	1.24359		114.317	16.5592		41.9413	5.92573		201.536	29.3712		43.3124	6.35985
AGQM L5 z1	23.1967	0.0327538	0.849437	3.69073		1058.42	22.1956		485057	255.471		8.12331	0.405526		1.81824	0.0443068		52.9479	0.819772		0.666273	0.0214266		4.2279	0.234031		4.8359	0.100124		1.08381	0.0518185		23.3912	0.196563		7.9444	0.169974		93.8606	2.98214		35.3461	0.527874		172.369	4.50187		37.9214	0.928406
AGQM L5 z13	23.4067	0.0500287	0.774744	3.4039		969.664	13.769		485020	189.128		6.81869	0.78322		1.59126	0.0616421		46.4691	0.837282		0.413109	0.0337669		2.90055	0.16093		4.17777	0.224667		1.03057	0.112641		21.6776	0.799599		7.26401	0.130516		89.6572	2.03733		33.6118	0.761747		165.921	4.30997		35.8943	1.26553
AGQM L5 z17	23.1534	0.0300778	0.810098	4.4979		1311.97	27.876		484004	250.896		8.85243	0.771381		3.4886	0.0500511		61.4048	0.841392		1.14872	0.0402325		6.31712	0.160087		5.54222	0.243411		1.06804	0.058021		27.1442	0.347609		9.49103	0.174397		113.917	4.19194		43.1744	0.743469		216.182	6.31057		46.8624	1.31831
AGQM L5 z6	23.1998	0.0392944	0.853903	5.92897		1140.43	34.0063		484817	269.929		7.91225	0.339112		1.51636	0.0606189		55.6781	1.79422		0.565774	0.0353913		3.96374	0.156127		4.98485	0.146842		1.11194	0.0300498		24.9729	1.30771		8.49153	0.336552		101.152	3.8562		37.5819	0.804941		184.84	8.19558		39.9721	1.54766
AGQM L5 z8	23.1593	0.0649222	0.780566	3.11053		1076.65	17.4264		484943	224.633		8.13255	0.558345		3.28975	0.0777395		50.111	0.297269		1.11141	0.0346331		6.08497	0.35826		5.16667	0.272067		1.17613	0.0519779		23.9275	0.701055		7.93745	0.149609		96.5286	1.17962		35.7328	1.23604		176.595	3.763		37.845	0.633018
AGQM M z10	23.3053	0.0682767	0.65614	2.83368		1487.86	109.239		479760	494.799		25.2443	0.92974		2.08621	0.13081		73.1013	3.81985		0.631534	0.0565685		3.61176	0.251194		3.91716	0.465948		0.275132	0.0817401		19.9855	2.08168		7.37612	1.21855		100.588	10.1771		42.7464	3.73088		245.144	18.043		57.6348	4.73963
AGQM M z11	23.3139	0.0204153	0.597925	18.9374		1410.65	254.536		481430	445.956		19.545	0.368404		0.450761	0.0830247		63.5205	11.2213		0.197199	0.0435946		1.95099	0.316643		3.63267	0.660525		0.282466	0.0569351		20.9947	3.66301		7.68527	1.38785		103.948	19.0664		42.3559	6.99123		233.029	42.6623		53.9709	9.88941
AGQM M z3						1493.22	97.1149		481452	387.42		21.8421	0.644582		1.46134	0.0859299		70.2595	4.19481		0.452185	0.0227638		3.09339	0.193334		4.28576	0.242417		0.296198	0.0389196		22.6749	1.28044		8.23149	0.69907		106.594	6.34863		43.9597	2.55908		237.709	13.5197		54.4913	3.18781
AGQM M z5						1337.06	223.985		447080	786.066		58.6932	9.88985		70.5725	14.9312		345.077	49.1393		16.0935	2.87204		64.488	11.5159		19.5872	4.33422		3.40307	0.903362		45.8826	7.41443		13.0215	6.73556		120.78	25.2827		45.6429	5.65125		209.799	35.7081		42.3116	8.97037
AGQM M z7						1107.52	349.616		482277	553.175		19.2822	1.05996		2.71979	0.571299		63.589	13.6662		0.622557	0.1139		3.89087	0.809517		4.1835	0.779689		0.51057	0.0808917		20.3768	4.68021		7.01271	1.66658		85.754	16.0212		34.7701	7.55707		182.495	40.0948		39.9363	8.43782

## Sheet: 48C Age
48C TIMS Age Data
	Dates (Ma)																Composition							Isotopic Ratios
	206Pb/238U	±2σ abs	206Pb/238U <Th>	±2σ abs	207Pb/235U	±2σ abs	207Pb/206Pb	±2σ abs	207Pb/206Pb <Th>	±2σ abs	Corr. Coeff	% disc		Modeled eruption age	±2σ abs		Th/U	Th/U (magma)	U (pg)	Pb* (pg)	Pbc (pg)	Pb*/Pbc		206Pb/204Pb	208Pb/206Pb	206Pb/238U	±2σ %	207Pb/235 U	±2σ %	207Pb/206Pb	±2σ %
	a		b		a		a		b			c					d	e		f	g	h		i	j	j			j		j
Accepted
														23.2664	0.0378738
48C L4 z2	23.2439	0.0364302	23.3215	0.037969	23.4738	0.431556	47.0796	43.2287	39.0983	43.3188	0.358548	50.6284					0.809251	2.83	887.06	3.60283	0.367596	9.80106		575.796	0.259072	0.00361222	0.157013	0.0233875	1.85979	0.0469789	1.80915
48C L4 z9	23.2025	0.146795	23.2801	0.146905	23.1789	2.25225	20.7355	232.407	12.6983	232.797	0.264701	-11.8975					1.03173	3.61	474.21	2.02747	1.06281	1.90765		121.463	0.330298	0.00360577	0.633811	0.0230903	9.82813	0.046465	9.67962
48C L4 z10	23.3381	0.0457394	23.4158	0.0476945	23.3356	0.545535	23.0741	54.9329	15.0793	55.0501	0.421382	-1.14415					0.630044	2.21	1384.31	5.39336	0.713141	7.56283		468.638	0.201698	0.00362689	0.196341	0.0232482	2.36475	0.0465103	2.28872
48C L4 z11	23.3515	0.112788	23.4291	0.112991	24.324	1.63503	121.513	157.148	113.681	157.406	0.307176	80.7826					1.01623	3.55	203.565	0.874029	0.322977	2.70617		164.827	0.325325	0.00362897	0.483878	0.0242448	6.80269	0.0484762	6.66989
48C L5 z1	23.1948	0.0214364	23.2724	0.0245913	23.3151	0.0706039	35.7391	6.04911	27.7217	6.19278	0.679904	35.0998					0.731567	2.56	11653.2	46.3156	0.584452	79.2462		4612.5	0.234204	0.00360457	0.0925854	0.0232275	0.306315	0.0467567	0.25054
48C L5 z2	23.3355	0.150665	23.413	0.150767	24.6421	2.30074	154.007	216.073	146.221	216.445	0.376659	84.8478					0.776636	2.71	153.55	0.622111	0.3158	1.96995		131.336	0.248625	0.00362648	0.646815	0.0245656	9.45038	0.0491514	9.22617
48C M4 z8	23.2644	0.109946	23.342	0.110095	23.5107	1.61552	48.7659	162.902	40.7941	163.171	0.307116	52.2937					1.27242	4.45	329.976	1.49487	0.513523	2.91101		167.122	0.407346	0.00361542	0.473446	0.0234247	6.95129	0.0470121	6.82071
48C S4 z11	23.3427	0.144869	23.4203	0.145009	23.441	2.07391	33.5311	210.353	25.5634	210.715	0.301615	30.3847					0.895076	3.13	292.955	1.22	0.578463	2.10903		136.057	0.286542	0.00362761	0.621739	0.0233544	8.94987	0.0467136	8.78231
Rejected
Uncertainty >0.15 Ma
48C S4 z6	23.3037	0.806757	23.3858	0.806106	20.8211	12.5797	-257.421	1526.58	-266.356	1529.49	0.258081	109.053					0.977879	4	215.314	0.909628	2.68234	0.339118		37.2097	0.313112	0.00362153	3.46818	0.0207173	61.0397	0.0415084	60.2378
a Isotopic dates calculated using lambda238 = 1.55125E-10 (Jaffey et al. 1971) and lambda235 = 9.8485E-10 (Jaffey et al. 1971).
b Corrected for initial Th/U disequilibrium using radiogenic 208Pb and Th/U[magma] specified.
c % discordance = 100 - (100 * (206Pb/238U date) / (207Pb/206Pb date))
d Th contents calculated from radiogenic 208Pb and 230Th-corrected 206Pb/238U date of the sample and assuming concordance between U-Pb Th-Pb systems.
e Th/U ratio of magma from which mineral crystallized.
f Total mass of radiogenic Pb.
g Total mass of common Pb.
h Ratio of radiogenic Pb (including 208Pb) to common Pb.
i Measured ratio corrected for fractionation and spike contribution only.
j Measured ratios corrected for fractionation and tracer and blank.

## Sheet: SPM Age
SPM TIMS Age Data
	Dates (Ma)																Composition							Isotopic Ratios
	206Pb/238U	±2σ abs	206Pb/238U <Th>	±2σ abs	207Pb/235U	±2σ abs	207Pb/206Pb	±2σ abs	207Pb/206Pb <Th>	±2σ abs	Corr. Coeff	% disc		Modeled eruption age	±2σ abs		Th/U	Th/U (magma)	U (pg)	Pb* (pg)	Pbc (pg)	Pb*/Pbc		206Pb/204Pb	208Pb/206Pb	206Pb/238U	±2σ %	207Pb/235 U	±2σ %	207Pb/206Pb	±2σ %
	a		b		a		a		b			c					d	e		f	g	h		i	j	j			j		j
Accepted
														23.2653	0.0263034
SPM L4 z2	23.2637	0.0969345	23.3404	0.0973597	24.3867	1.4132	136.512	134.87	128.763	135.131	0.330632	82.9585					0.686064	2.33	789.103	3.11454	0.84697	3.67727		226.099	0.219625	0.00361531	0.417429	0.0243079	5.86483	0.0487862	5.74026
SPM L4 z3	23.3026	0.0908091	23.3798	0.0908709	24.4372	1.30691	137.507	124.331	129.716	124.544	0.339801	83.0535					1.26997	4.39	579.979	2.63358	0.568092	4.63584		246.409	0.406552	0.00362136	0.390399	0.024359	5.41263	0.0488069	5.29262
SPM L4 z6	23.2907	0.0573917	23.3678	0.0588661	24.0134	0.79474	96.9687	77.4586	89.1297	77.6225	0.342017	75.9812					0.633634	2.18	1656.79	6.45534	0.995776	6.48272		390.01	0.202844	0.0036195	0.24686	0.0239315	3.34886	0.0479749	3.2725
SPM L4 z7	23.2768	0.118898	23.3538	0.118833	24.7542	1.74567	170.656	163.091	162.929	163.374	0.331646	86.3604					1.08752	3.73	571.687	2.48951	0.755815	3.29381		187.053	0.348146	0.00361734	0.511725	0.0246788	7.13833	0.0495026	6.98525
SPM L5 z1	23.3015	0.0349737	23.3788	0.0383886	23.9289	0.409357	87.415	39.8922	79.5399	40.0071	0.361465	73.3438					0.556486	1.93	776.119	2.96472	0.233421	12.7012		761.706	0.178148	0.00362119	0.150363	0.0238462	1.73096	0.0477818	1.68214
SPM L5 z4	23.2153	0.0492746	23.2925	0.0510833	24.0877	0.602939	112.036	58.349	104.177	58.4803	0.324063	79.2788					0.636099	2.2	574.513	2.23319	0.255961	8.72473		518.201	0.203637	0.00360776	0.212633	0.0240064	2.53291	0.0482818	2.47198
SPM L5 z7	23.2801	0.104504	23.3572	0.104517	24.9764	1.53117	191.399	141.152	183.693	141.394	0.338532	87.8369					1.15711	3.98	187.378	0.829444	0.212608	3.90128		214.996	0.370422	0.00361786	0.449708	0.024903	6.20617	0.0499452	6.06861
SPM L5 z9	23.175	0.0605783	23.2525	0.0669653	23.4178	0.850516	48.4168	86.1641	40.4197	86.3666	0.287097	52.1343					0.618803	2.16	1935.29	7.46843	1.61266	4.63113		294.886	0.198104	0.00360149	0.261865	0.0233311	3.67396	0.047005	3.60736
SPM L5 z20	23.1652	0.123663	23.2413	0.124648	22.7245	1.87219	-23.6579	198.732	-31.6212	199.068	0.261441	197.917					1.19787	4	1801.86	7.98577	3.3583	2.37792		142.089	0.383463	0.00359996	0.53479	0.0226325	8.33117	0.0456171	8.20753
SPM L5 z20b	23.1837	0.0306456	23.274	0.0319739	23.2487	0.338674	29.9738	34.5206	20.6314	34.6013	0.292795	22.6534					0.680271	4	4237.07	16.6227	1.40522	11.8293		713.008	0.218497	0.00360285	0.132424	0.0231606	1.47348	0.0466441	1.43992
SPM L5 z22	23.1997	0.030313	23.2773	0.0401905	23.2941	0.301283	33.0458	30.227	25.0297	30.405	0.398231	29.7953					0.672306	2.35	4152.38	16.2601	1.19958	13.5548		816.335	0.215232	0.00360534	0.130896	0.0232064	1.30828	0.0467039	1.26147
SPM L z3	23.2003	0.0556999	23.2786	0.0605861	22.92	0.746157	-6.38342	78.0557	-14.5317	78.2338	0.275752	463.446					0.713023	2.54	3367.12	13.3214	2.45526	5.42564		334.671	0.228897	0.00360543	0.240515	0.0228295	3.29236	0.0459443	3.23415
SPM L z4	23.2279	0.0225234	23.3056	0.0371609	23.3252	0.149605	33.3677	14.7576	25.342	15.0977	0.402681	30.3881					0.599173	2.1	5715.83	21.9999	0.804384	27.3501		1658.16	0.192344	0.00360973	0.0971417	0.0232377	0.648784	0.0467102	0.615266
SPM L z4a	23.2464	0.0238611	23.324	0.0280403	23.5194	0.185243	51.5128	18.2134	43.5353	18.3149	0.386015	54.8726					0.601868	2.1	6340.24	24.4469	0.859622	28.4392		1663.73	0.193207	0.00361261	0.102829	0.0234334	0.796773	0.0470662	0.7623
SPM L z10B	23.2581	0.0288378	23.3359	0.0429196	23.3218	0.142219	29.8908	13.848	21.8652	14.258	0.405344	22.1898					0.5555	1.95	6138.69	23.3872	0.778856	30.0276		1839.53	0.178323	0.00361443	0.124214	0.0232343	0.616844	0.0466425	0.576856
SPM L z11	23.2099	0.0315299	23.2879	0.0413316	23.3021	0.330816	32.8178	33.5545	24.7592	33.7282	0.303662	29.2765					0.650951	2.3	2267.74	8.83953	0.734022	12.0426		730.907	0.208968	0.00360693	0.136091	0.0232144	1.43604	0.0466995	1.40036
SPM L z12	23.1963	0.026869	23.2742	0.0397417	23.2407	0.20929	27.8298	21.0661	19.7711	21.3218	0.337135	16.6492					0.599491	2.11	8514.49	32.7271	1.71745	19.0557		1160.94	0.192448	0.00360481	0.116042	0.0231525	0.910877	0.0466024	0.877978
SPM L z15	23.2496	0.0296406	23.3275	0.0369754	23.3661	0.317348	35.3623	32.0891	27.334	32.2263	0.306688	34.2532					0.792766	2.79	2216.83	8.97253	0.686223	13.0752		764.693	0.25449	0.00361311	0.127718	0.0232789	1.37384	0.0467491	1.33981
SPM M4 z5	23.2419	0.0210567	23.3195	0.0351501	23.3226	0.261254	31.645	26.525	23.6433	26.73	0.323799	26.5543					0.632647	2.21	1331.21	5.16922	0.342501	15.0926		915.955	0.202534	0.00361191	0.0907613	0.0232351	1.13309	0.0466766	1.10656
SPM M4 z13	23.28	0.0188142	23.3576	0.0354483	23.4006	0.205316	35.8106	20.8774	27.8257	21.1414	0.235705	34.9913					0.592094	2.07	3840.04	14.7802	0.76811	19.2424		1174.71	0.18955	0.00361784	0.0809631	0.0233137	0.887544	0.0467579	0.871417
SPM M z6	23.2239	0.128646	23.3016	0.128524	24.2763	1.91081	129.759	183.425	121.881	183.744	0.335015	82.1023					1.18027	4.13	494.697	2.19562	0.710501	3.09025		173.267	0.378885	0.0036091	0.554939	0.0241966	7.96555	0.0486463	7.79712
SPM S4 z8	23.2113	0.0391154	23.2889	0.0478715	23.283	0.476394	30.6938	48.397	22.6743	48.569	0.334124	24.3779					0.640072	2.24	608.425	2.36395	0.274187	8.62168		530.254	0.204912	0.00360715	0.168822	0.0231952	2.06965	0.0466581	2.01926
SPM S z6	23.2475	0.150244	23.3252	0.149983	23.6902	2.22079	68.8488	220.927	60.8907	221.364	0.337927	66.234					0.629165	2.2	295.787	1.149	0.493791	2.3269		151.725	0.20197	0.00361278	0.647447	0.0236056	9.48409	0.0474098	9.28525
SPM S z12	23.1947	0.0441374	23.2724	0.0447939	23.4921	0.575187	54.0367	57.701	46.0375	57.8116	0.34166	57.076					1.06365	3.72	1313.18	5.66101	0.565162	10.0166		535.346	0.341449	0.00360456	0.190633	0.0234059	2.47686	0.047116	2.41815
SPM S z14	23.2356	0.0484446	23.3133	0.0488196	23.829	0.62118	84.106	61.0963	76.1664	61.2066	0.334704	72.3734					1.30403	4.56	974.976	4.44794	0.452589	9.82778		498.498	0.418612	0.00361093	0.208869	0.0237455	2.63753	0.0477152	2.57495
Rejected
Interpretation: inherited core
SPM L2 z12	23.5629	0.0857262	23.6406	0.0861829	23.7926	1.27848	47.0597	127.59	39.179	127.807	0.29481	49.9297					0.887427	3.1	819.689	3.44211	1.02703	3.35151		205.438	0.284858	0.00366189	0.364484	0.0237088	5.43664	0.0469785	5.34046
Interpretation: xenocryst/detrital
SPM L5 z10	33.1393	0.0775095	33.2167	0.0782067	96.6252	1.09984	2233.26	20.1084	2229.21	20.1272	0.230078	98.5161					1.71185	5.99	1872.97	14.0464	2.20821	6.361		298.051	0.547195	0.00515396	0.234492	0.0998363	1.19327	0.140553	1.1615
SPM L5 z17	70.1426	0.0858738	70.2143	0.0924432	68.8477	0.83415	24.0849	29.2604	21.6185	29.3008	0.318943	-191.23					0.703524	2.1	687.279	8.22358	0.584177	14.0772		841.336	0.224146	0.0109403	0.123095	0.0701562	1.25313	0.0465297	1.21903
SPM L z17	70.1258	0.0858572	70.2031	0.0893142	68.8316	0.833962	24.0849	29.2604	21.4251	29.2902	0.318937	-191.161					0.701548	2.47	643.022	7.69217	0.546427	14.0772		841.336	0.224146	0.0109376	0.1231	0.0701393	1.25313	0.0465297	1.21903
Uncertainty >0.15 Ma
SPM L4 z1	23.2437	0.23348	23.3342	0.232715	25.038	3.46136	200.844	317.676	191.797	318.301	0.344269	88.427					0.668131	4	208.125	0.817974	0.542823	1.50689		103.604	0.214012	0.00361219	1.0063	0.0249653	13.9956	0.0501486	13.6817
SPM M z3	23.3919	0.561426	23.4766	0.559721	27.636	8.39127	414.124	672.597	406.019	673.76	0.32112	94.3515					0.883885	4	265.833	1.11407	1.7037	0.653912		53.0981	0.283816	0.00363526	2.40444	0.0275911	30.7787	0.0550716	30.0928
SPM M4 z3	23.043	0.339737	23.1225	0.339783	21.4183	5.2761	-157.438	609.542	-166.013	610.648	0.273495	114.636					1.07523	4	178.114	0.762202	0.925826	0.823267		62.6629	0.344261	0.00358095	1.477	0.0213179	24.8943	0.0431955	24.5315
SPM S z1	23.1709	0.213583	23.2623	0.212896	23.0809	3.18352	13.7147	328.787	4.22683	329.472	0.327532	-68.9499					0.640791	4	402.703	1.56265	0.97157	1.60838		110.246	0.205826	0.00360085	0.923429	0.0229915	13.9503	0.0463294	13.6756
SPM S z4	23.312	0.358621	23.4016	0.357457	26.2343	5.35772	302.812	461.306	294.045	462.173	0.326271	92.3015					0.70597	4	547.953	2.18571	2.23099	0.979704		73.0215	0.226738	0.00362282	1.54114	0.0261735	20.6876	0.0524214	20.2372
SPM S z9	22.8567	0.24804	22.9341	0.247686	19.339	3.03296	-399.24	404.928	-408.089	405.756	0.312166	105.725					1.15184	4	634.826	2.73689	1.39942	1.95573		117.582	0.36978	0.00355193	1.08712	0.0192285	15.833	0.0392803	15.528
SPM S2 z1	23.0434	0.2429	23.1359	0.242723	20.0896	3.78698	-320.85	482.459	-331.156	483.526	0.253746	107.182					0.596538	4	516.569	1.96051	1.93957	1.01079		79.5898	0.191104	0.00358101	1.05598	0.0199823	19.0375	0.0404886	18.7973
SPM S2 z4	23.2501	0.183465	23.3366	0.183561	24.5701	2.77901	155.674	262.63	146.953	263.105	0.322868	85.0649					0.814068	4	251.494	1.02475	0.642581	1.59474		109.018	0.260713	0.00361318	0.790519	0.024493	11.4479	0.0491862	11.2176
SPM S2 z6	23.3308	0.311317	23.4224	0.310368	24.9459	4.64952	183.449	430.322	174.302	431.174	0.327076	87.2822					0.62945	4	663.119	2.58936	2.3412	1.106		81.4925	0.201627	0.00362575	1.33678	0.0248722	18.8683	0.0497748	18.4743
SPM S2 z21	22.8493	0.324398	22.9347	0.32423	16.9905	5.05161	-751.64	831.278	-762.143	833.259	0.285323	103.04					0.856804	4	138.373	0.553685	0.680161	0.81405		64.8018	0.27441	0.00355079	1.42224	0.0168738	29.9815	0.0344811	29.6071
a Isotopic dates calculated using lambda238 = 1.55125E-10 (Jaffey et al. 1971) and lambda235 = 9.8485E-10 (Jaffey et al. 1971).
b Corrected for initial Th/U disequilibrium using radiogenic 208Pb and Th/U[magma] specified.
c % discordance = 100 - (100 * (206Pb/238U date) / (207Pb/206Pb date))
d Th contents calculated from radiogenic 208Pb and 230Th-corrected 206Pb/238U date of the sample and assuming concordance between U-Pb Th-Pb systems.
e Th/U ratio of magma from which mineral crystallized.
f Total mass of radiogenic Pb.
g Total mass of common Pb.
h Ratio of radiogenic Pb (including 208Pb) to common Pb.
i Measured ratio corrected for fractionation and spike contribution only.
j Measured ratios corrected for fractionation and tracer and blank.

## Sheet: SPU Age
SPU TIMS Age Data
	Dates (Ma)																Composition							Isotopic Ratios
	206Pb/238U	±2σ abs	206Pb/238U <Th>	±2σ abs	207Pb/235U	±2σ abs	207Pb/206Pb	±2σ abs	207Pb/206Pb <Th>	±2σ abs	Corr. Coeff	% disc		Modeled eruption age	±2σ abs		Th/U	Th/U (magma)	U (pg)	Pb* (pg)	Pbc (pg)	Pb*/Pbc		206Pb/204Pb	208Pb/206Pb	206Pb/238U	±2σ %	207Pb/235 U	±2σ %	207Pb/206Pb	±2σ %
	a		b		a		a		b			c					d	e		f	g	h		i	j	j			j		j
Accepted
														23.1965	0.0380189
SPU L2 z7	23.1654	0.0291088	23.2431	0.0302729	23.3721	0.215756	44.679	21.3619	36.6602	21.4203	0.378771	48.1513					1.04801	3.66	2893.84	12.4123	0.442146	28.073		1473.31	0.33643	0.0036	0.125882	0.0232849	0.933801	0.0469317	0.89315
SPU L5 z2	23.2307	0.0550419	23.3083	0.0576048	23.2196	0.779647	22.0671	80.1006	14.0408	80.2557	0.282368	-5.27313					1.03145	3.61	898.322	3.84524	0.684956	5.61385		321.267	0.330207	0.00361016	0.237363	0.0231313	3.39625	0.0464906	3.33685
SPU L5 z3	23.1312	0.0522318	23.2088	0.0549719	23.0826	0.706242	18.028	73.0327	9.95721	73.1785	0.274499	-28.3067					1.03097	3.6	1556.35	6.63658	1.08332	6.12615		348.722	0.33096	0.00359467	0.226212	0.0229933	3.09454	0.0464124	3.04006
SPU L5 z15	23.1887	0.0503669	23.2663	0.0535849	23.4227	0.699093	47.5063	70.7046	39.5069	70.8496	0.306773	51.1881					0.960894	3.36	619.064	2.60233	0.42529	6.11895		353.916	0.307621	0.00360362	0.217596	0.023336	3.01924	0.0469871	2.95957
SPU L5 z17	23.1575	0.0277574	23.235	0.0321268	23.3098	0.271889	39.0486	27.3997	31.0291	27.4985	0.335707	40.6958					1.09648	3.83	1088.74	4.71749	0.282802	16.6812		904.199	0.35103	0.00359876	0.120079	0.0232222	1.17986	0.0468212	1.14469
SPU L5 z18	23.252	0.0810217	23.3296	0.0823209	22.987	1.17401	-4.63716	122.572	-12.6932	122.786	0.274491	601.427					1.1928	4.17	1089.27	4.84147	1.26525	3.82649		217.472	0.381858	0.00361348	0.349079	0.022897	5.16529	0.0459775	5.08047
SPU L5 z21	23.1874	0.0504607	23.265	0.0536797	23.399	0.701406	45.1907	71.1495	37.1864	71.2952	0.286831	48.6899					0.960578	3.36	575.01	2.41675	0.395427	6.11174		353.557	0.30752	0.00360342	0.218013	0.023312	3.03227	0.0469416	2.97689
SPU L z1	23.2606	0.12637	23.3383	0.12625	24.921	1.85308	188.133	171.398	180.356	171.697	0.331924	87.6361					1.03591	3.62	743.902	3.20165	1.0462	3.06027		176.814	0.33254	0.00361482	0.544258	0.0248472	7.52743	0.0498752	7.36462
SPU L z7	23.3082	0.143385	23.3858	0.143177	24.9107	2.12104	182.386	196.569	174.616	196.91	0.328127	87.2204					1.0561	3.69	518.166	2.24504	0.834931	2.68889		156.906	0.339019	0.00362222	0.616282	0.0248367	8.61946	0.0497522	8.43729
SPU L z8	23.1794	0.123193	23.2591	0.123049	24.2341	1.79744	130.138	172.751	122.039	173.06	0.336287	82.1886					1.06849	4	1614.41	6.97069	2.19254	3.17928		181.88	0.343035	0.00360217	0.532433	0.0241541	7.50585	0.0486541	7.34386
SPU L z9	23.2126	0.0453258	23.2904	0.0458448	23.8105	0.56607	84.5892	55.6818	76.6388	55.7855	0.334753	72.5584					1.16257	4.07	1205.26	5.32185	0.507861	10.4789		546.812	0.373203	0.00360735	0.195615	0.0237268	2.40538	0.0477249	2.34692
SPU L z11	23.1011	0.0366208	23.1788	0.0374053	22.8885	0.400707	0.606639	41.5146	-7.50764	41.6	0.34311	-3708.05					1.10619	3.87	1899.78	8.2314	0.561886	14.6496		767.737	0.355111	0.00358999	0.158808	0.0227977	1.7705	0.0460778	1.72218
SPU L z15	23.2726	0.0648164	23.3503	0.0650845	24.0224	0.911139	99.7097	88.7767	91.8092	88.9351	0.338093	76.6596					1.17659	4.11	918.547	4.08019	0.630082	6.47566		343.707	0.377697	0.00361669	0.279012	0.0239406	3.83791	0.0480305	3.75263
SPU L z19	23.1932	0.0308815	23.2709	0.0321833	23.2911	0.259351	33.4074	26.1647	25.3797	26.2276	0.310065	30.5745					0.967415	3.38	3179.6	13.395	0.797442	16.7974		937.226	0.310556	0.00360433	0.133388	0.0232034	1.12634	0.0467111	1.09188
SPU M6 z1	23.1535	0.0995119	23.2311	0.101442	22.886	1.49977	-5.12498	157.297	-13.2185	157.583	0.281353	551.777					0.871781	3.05	343.593	1.41047	0.491592	2.86918		179.376	0.279095	0.00359814	0.430565	0.0227952	6.62734	0.0459682	6.51923
SPU M z3	23.2052	0.0484683	23.2829	0.049013	23.2728	0.581086	30.2565	59.3069	22.2276	59.4183	0.282749	23.305					1.14176	3.99	908.646	3.98883	0.378922	10.5268		552.16	0.366523	0.0036062	0.209244	0.0231849	2.52557	0.0466498	2.47435
SPU M z9	23.2367	0.0451415	23.3144	0.0456697	23.8932	0.571922	90.4574	56.0248	82.5234	56.1288	0.333294	74.312					1.16523	4.08	1205.2	5.33074	0.509036	10.4722		546.11	0.374055	0.00361109	0.194619	0.0238103	2.42193	0.0478432	2.36397
SPU M z12	23.2612	0.0373428	23.3389	0.0379622	23.5562	0.465291	53.7618	46.6625	45.786	46.7464	0.302398	56.7328					1.25555	4.39	1053.02	4.75589	0.469591	10.1277		536.762	0.403047	0.00361492	0.160826	0.0234705	1.99824	0.0471106	1.95535
SPU M z17	23.1012	0.11412	23.1789	0.114452	22.482	1.68003	-43.2545	180.939	-51.4329	181.258	0.25546	153.408					0.84141	2.94	703.587	2.86049	1.16938	2.44616		156.694	0.270111	0.00359	0.494885	0.0223883	7.55583	0.0452503	7.44472
SPU M z20	23.1956	0.0336113	23.2733	0.0341566	23.5646	0.392887	61.3793	39.1444	53.3879	39.2189	0.340879	62.2095					1.37089	4.8	1831.24	8.46022	0.53632	15.7746		778.239	0.440078	0.00360469	0.145165	0.023479	1.6867	0.0472613	1.64257
Rejected
Uncertainty >0.15 Ma
SPU L2 z5	23.2621	0.18909	23.3398	0.18911	22.5033	2.91377	-57.843	314.315	-65.9884	314.859	0.269636	140.216					0.915589	3.2	759.496	3.16539	2.19214	1.44397		98.6854	0.293915	0.00361505	0.814333	0.0224098	13.0922	0.0449798	12.8964
SPU L5 z19	23.0858	0.22259	23.1685	0.222771	22.6667	3.4514	-21.5585	367.353	-30.2395	368.016	0.257152	207.084					0.954322	4	669.143	2.79336	2.29392	1.21772		85.5201	0.305591	0.0035876	0.965917	0.0225744	15.3973	0.0456567	15.1776
SPU M z1	23.1244	0.316431	23.2033	0.315604	22.1378	4.73764	-83.7641	520.045	-92.1335	521.018	0.323227	127.607					1.09786	4	416.311	1.80015	1.49735	1.20222		79.7744	0.352456	0.00359361	1.37084	0.0220418	21.6348	0.0445052	21.2314
SPU M z4	22.1602	1.78494	22.2326	1.78436	16.7168	27.9965	-711.643	4650.57	-720.747	4660.1	0.244944	103.114					1.33888	4	1054.53	4.58311	29.3942	0.155919		26.5246	0.429791	0.00344351	8.06857	0.0165998	168.858	0.0349781	167.064
SPU M z14	23.0775	0.0557383	23.1562	0.0560903	21.4677	0.65306	-155.384	73.2873	-163.857	73.4417	0.54009	114.852					1.10831	4	1895.34	8.19121	0.797166	10.2754		544.703	0.35581	0.00358632	0.241959	0.0213675	3.07434	0.0432314	2.95051
SPU S z1	23.1605	0.155617	23.238	0.156467	23.636	2.33495	72.2676	232.665	64.2994	233.11	0.341414	67.9517					0.810264	2.83	220.292	0.892073	0.378591	2.35629		147.414	0.2594	0.00359923	0.673115	0.0235509	9.99423	0.0474778	9.78485
a Isotopic dates calculated using lambda238 = 1.55125E-10 (Jaffey et al. 1971) and lambda235 = 9.8485E-10 (Jaffey et al. 1971).
b Corrected for initial Th/U disequilibrium using radiogenic 208Pb and Th/U[magma] specified.
c % discordance = 100 - (100 * (206Pb/238U date) / (207Pb/206Pb date))
d Th contents calculated from radiogenic 208Pb and 230Th-corrected 206Pb/238U date of the sample and assuming concordance between U-Pb Th-Pb systems.
e Th/U ratio of magma from which mineral crystallized.
f Total mass of radiogenic Pb.
g Total mass of common Pb.
h Ratio of radiogenic Pb (including 208Pb) to common Pb.
i Measured ratio corrected for fractionation and spike contribution only.
j Measured ratios corrected for fractionation and tracer and blank.

## Sheet: 40B Age
40B TIMS Age Data
	Dates (Ma)																Composition							Isotopic Ratios
	206Pb/238U	±2σ abs	206Pb/238U <Th>	±2σ abs	207Pb/235U	±2σ abs	207Pb/206Pb	±2σ abs	207Pb/206Pb <Th>	±2σ abs	Corr. Coeff	% disc		Modeled eruption age	±2σ abs		Th/U	Th/U (magma)	U (pg)	Pb* (pg)	Pbc (pg)	Pb*/Pbc		206Pb/204Pb	208Pb/206Pb	206Pb/238U	±2σ %	207Pb/235 U	±2σ %	207Pb/206Pb	±2σ %
	a		b		a		a		b			c					d	e		f	g	h		i	j	j			j		j
Accepted
														23.2442	0.0415983
40B L2 z7	23.239	0.0253425	23.3167	0.0291992	23.4419	0.180012	44.3035	17.6492	36.307	17.75	0.413519	47.5459					0.609425	2.13	4586.72	17.7128	0.59099	29.9714		1749.18	0.195633	0.00361145	0.109249	0.0233553	0.776806	0.0469243	0.737639
40B L5 z2	23.1814	0.0436688	23.259	0.0469692	23.3357	0.526154	39.2618	53.1344	31.2505	53.2552	0.3548	40.9569					1.01902	3.56	1642.07	6.9952	0.83215	8.40618		473.011	0.32623	0.00360249	0.188717	0.0232483	2.28073	0.0468254	2.22055
40B L5 z4	23.2155	0.100846	23.2931	0.102217	23.1153	1.52821	12.6992	158.347	4.65758	158.623	0.264494	-82.8111					1.02992	3.6	2555.09	10.9245	3.86794	2.82437		170.963	0.329719	0.0036078	0.435171	0.0230262	6.6868	0.0463097	6.58501
40B L5 z6	23.1989	0.0284478	23.2765	0.0328707	23.3133	0.272335	35.1224	27.4538	27.1105	27.5549	0.333158	33.9485					1.07615	3.76	1783.9	7.70669	0.452514	17.0308		927.069	0.344519	0.00360521	0.122846	0.0232257	1.18162	0.0467444	1.1461
40B L5 z8	23.1282	0.0526816	23.2058	0.0552592	23.2574	0.641367	36.6274	65.4292	28.5919	65.5631	0.284266	36.8554					1.05566	3.69	1116.95	4.78794	0.679165	7.04974		396.453	0.337964	0.00359421	0.228189	0.0231693	2.7894	0.0467738	2.73311
40B L5 z10	23.1908	0.0700138	23.2684	0.0723491	23.0529	1.03394	8.68478	107.413	0.627305	107.613	0.271685	-167.028					0.958062	3.35	832.693	3.49637	0.846938	4.12824		245.114	0.306715	0.00360396	0.302446	0.0229633	4.5362	0.0462324	4.46341
40B L5 z16	23.2062	0.0723589	23.2838	0.0740374	23.2072	1.06362	23.3113	109.49	15.2802	109.685	0.266368	0.450923					1.11203	3.89	726.885	3.16684	0.763274	4.14902		238.152	0.356006	0.00360635	0.31237	0.0231188	4.63573	0.0465147	4.56235
40B L5 z18	23.1907	0.0704239	23.2683	0.072369	23.4028	0.993098	45.248	100.356	37.2482	100.543	0.339118	48.7476					1.04169	3.64	301.379	1.29133	0.284473	4.53938		262.677	0.333487	0.00360394	0.30422	0.0233159	4.29259	0.0469427	4.19906
40B S2 z7	23.1873	0.0637017	23.2649	0.0658632	22.9791	0.900718	1.24642	93.4282	-6.82409	93.6053	0.348596	-1760.31					1.04087	3.64	432.73	1.85236	0.375838	4.92862		283.819	0.333225	0.00360341	0.275221	0.022889	3.96425	0.0460899	3.87677
40B S2 z12	23.1775	0.0807168	23.2551	0.0825798	23.3081	1.08304	36.7927	109.896	28.7766	110.102	0.346345	37.0051					0.984771	3.44	457.392	1.93242	0.456528	4.23286		249.292	0.315266	0.00360189	0.348881	0.0232204	4.70018	0.0467771	4.59092
Rejected
Uncertainty >0.15 Ma
40B L2 z1	23.2816	0.510965	23.3593	0.509417	26.1556	7.63864	298.853	660.179	291.242	661.286	0.325597	92.2097					1.06061	3.7	143.341	0.622145	0.83085	0.748806		56.6178	0.340465	0.0036181	2.19868	0.026094	29.5823	0.0523305	28.9412
40B L5 z11	23.0808	0.246507	23.1583	0.246899	21.9513	3.79606	-100.105	423.128	-108.361	423.872	0.272283	123.057					1.00689	3.51	488.661	2.06278	1.83005	1.12717		79.8468	0.322352	0.00358682	1.06993	0.0218541	17.4807	0.0442096	17.2201
40B M2 z3	22.7638	0.426581	22.8455	0.426305	18.5868	6.66619	-493.943	950.94	-503.494	952.932	0.254202	104.609					0.997026	4	479.25	1.98273	3.16384	0.626685		52.879	0.320145	0.00353748	1.87725	0.0184737	36.1945	0.0378926	35.7634
40B M6 z2	23.3764	0.113548	23.454	0.114792	24.7215	1.35439	157.527	125.893	149.751	126.116	0.38085	85.1604					1.003	3.51	252.337	1.08182	0.299309	3.6144		214.394	0.321091	0.00363285	0.486621	0.0246458	5.54556	0.0492252	5.37899
40B S2 z2	23.1036	0.353642	23.1822	0.352936	24.1535	5.30203	129.922	511.529	121.917	512.434	0.336746	82.2173					1.10805	4	118.508	0.514343	0.470299	1.09365		73.9429	0.354754	0.00359038	1.53342	0.0240728	22.2135	0.0486495	21.7451
40B S2 z17	22.9572	0.0735607	23.0521	0.0736603	18.3845	0.943931	-546.118	136.02	-557.236	136.375	0.402602	104.204					0.507397	4	1198.67	4.41404	0.780574	5.65487		356.428	0.162568	0.00356759	0.320996	0.0182709	5.181	0.0371602	5.0602
40B S2 z24	23.0663	0.0663244	23.1518	0.0672517	21.191	1.01578	-186.829	119.508	-196.098	119.752	0.242081	112.346					0.85327	4	754.301	3.06345	0.730516	4.19354		255.21	0.273266	0.00358457	0.288053	0.0210892	4.84363	0.0426891	4.78196
a Isotopic dates calculated using lambda238 = 1.55125E 10 (Jaffey et al. 1971) and lambda235 = 9.8485E 10 (Jaffey et al. 1971).
b Corrected for initial Th/U disequilibrium using radiogenic 208Pb and Th/U[magma] specified.
c % discordance = 100 (100 * (206Pb/238U date) / (207Pb/206Pb date))
d Th contents calculated from radiogenic 208Pb and 230Th corrected 206Pb/238U date of the sample and assuming concordance between U Pb Th Pb systems.
e Total mass of radiogenic Pb.
f Total mass of common Pb.
g Ratio of radiogenic Pb (including 208Pb) to common Pb.
h Th/U ratio of magma from which mineral crystallized.
i Measured ratio corrected for fractionation and spike contribution only.
j Measured ratios corrected for fractionation and tracer and blank.

## Sheet: SY2A Age
SY2A TIMS Age Data
	Dates (Ma)																Composition							Isotopic Ratios
	206Pb/238U	±2σ abs	206Pb/238U <Th>	±2σ abs	207Pb/235U	±2σ abs	207Pb/206Pb	±2σ abs	207Pb/206Pb <Th>	±2σ abs	Corr. Coeff	% disc		Modeled eruption age	±2σ abs		Th/U	Th/U (magma)	U (pg)	Pb* (pg)	Pbc (pg)	Pb*/Pbc		206Pb/204Pb	208Pb/206Pb	206Pb/238U	±2σ %	207Pb/235 U	±2σ %	207Pb/206Pb	±2σ %
	a		b		a		a		b			c					d	e		f	g	h		i	j	j			j		j
Accepted
														23.2572	0.0179374
SY2A L4 z3	23.1708	0.0477577	23.2483	0.0487994	23.0496	0.594634	10.4316	60.893	2.37188	61.0105	0.411484	-122.122					0.841359	2.94	917.67	3.74284	0.506859	7.38438		435.336	0.269354	0.00360083	0.206482	0.02296	2.60919	0.0462662	2.53102
SY2A L4 z4	23.2857	0.0987524	23.3633	0.098953	23.5859	1.49133	54.285	149.277	46.3302	149.534	0.358819	57.1046					1.06418	3.72	185.172	0.800954	0.256863	3.11821		185.375	0.340679	0.00361873	0.424856	0.0235004	6.3967	0.0471209	6.25675
SY2A L4 z12	23.2364	0.131512	23.314	0.131934	23.0232	2.01042	0.813105	209.323	-7.23988	209.699	0.287728	-2757.73					0.626458	2.19	2718.49	10.5317	5.36176	1.96423		135.654	0.200553	0.00361105	0.566993	0.0229334	8.83153	0.0460817	8.68532
SY2A L5 z2	23.1786	0.0416683	23.2562	0.0426204	23.5704	0.550188	63.7176	55.1171	55.7368	55.2191	0.297317	63.623					0.957308	3.35	428.162	1.79795	0.227487	7.90354		451.969	0.306474	0.00360205	0.180094	0.0234848	2.36143	0.0473077	2.31405
SY2A L5 z4	23.2011	0.0531736	23.2786	0.0536767	23.3178	0.753372	35.3722	76.8546	27.3597	76.9872	0.286738	34.4088					1.14996	4.02	862.876	3.79188	0.635316	5.9685		331.638	0.368149	0.00360555	0.229599	0.0232303	3.26813	0.0467495	3.20967
SY2A L5 z8	23.1836	0.0543938	23.2612	0.0549078	23.4101	0.691436	46.727	69.7004	38.7233	69.8241	0.335659	50.3849					1.11195	3.89	468.353	2.03913	0.304966	6.68643		372.296	0.355982	0.00360284	0.235044	0.0233233	2.98776	0.046972	2.9171
SY2A L5 z9	23.178	0.0540185	23.2556	0.0545794	23.2076	0.773523	26.2735	79.4924	18.2371	79.6302	0.276645	11.7818					1.08059	3.78	768.529	3.32017	0.586146	5.66441		320.5	0.345943	0.00360196	0.233478	0.0231192	3.37129	0.0465723	3.31414
SY2A M3 z6	23.1941	0.0609818	23.2717	0.0614746	23.3463	0.871363	39.0439	88.5746	31.0318	88.7409	0.311305	40.5948					0.960318	3.36	989.326	4.15868	0.64464	6.45118		359.72	0.307437	0.00360447	0.263392	0.023259	3.77541	0.0468213	3.70174
SY2A M3 z8	23.1736	0.0256376	23.2511	0.0268218	23.2041	0.185865	26.3642	18.3928	18.3292	18.4473	0.448809	12.102					1.10158	3.85	3683.97	15.9897	0.465717	34.3335		1777.5	0.352663	0.00360127	0.110832	0.0231156	0.810188	0.0465741	0.766173
SY2A M6 z5	23.1974	0.029583	23.275	0.0311473	23.2033	0.279839	23.8099	28.5203	15.7748	28.5878	0.294305	2.57212					0.897191	3.14	1353.31	5.60275	0.363816	15.3999		875.759	0.287227	0.00360499	0.127757	0.0231149	1.21986	0.0465245	1.18811
Rejected
Interpretation: xenocryst/detrital
SY2A L5 z7	23.9808	0.0615899	24.0583	0.0622192	23.9519	0.886514	21.0581	88.1721	13.2869	88.3242	0.313332	-13.8792					0.935911	3.27	626.97	2.70841	0.530706	5.10341		300.06	0.299577	0.00372694	0.257309	0.0238695	3.74505	0.0464712	3.67242
Uncertainty >0.15 Ma
SY2A L5 z5	23.3781	0.312425	23.463	0.312184	23.8179	4.83796	68.436	481.659	59.7867	482.512	0.261941	65.8395					0.874054	4	154.962	0.643401	0.741161	0.868099		67.1818	0.279897	0.00363311	1.33883	0.0237344	20.5515	0.0474016	20.242
SY2A S4 z1	23.2298	0.161329	23.3074	0.16139	23.2696	2.47773	27.3831	254.288	19.3584	254.707	0.2692	15.1675					1.28773	4.5	323.069	1.46708	0.79095	1.85484		112.879	0.41338	0.00361002	0.695745	0.0231817	10.7704	0.0465939	10.6043
SY2A S4 z2	23.2564	0.158925	23.334	0.158984	23.9511	2.44215	94.2401	240.017	86.3333	240.415	0.295874	75.3221					1.01509	3.55	115.036	0.491577	0.267165	1.83997		118.098	0.324966	0.00361417	0.684591	0.0238687	10.3171	0.0479197	10.1356
SY2A S4 z5	25.3401	8.7144	25.4149	8.71425	25.4266	8.73099	33.6114	109.672	26.5312	109.865	0.991291	24.6085					1.24466	4	403.638	1.97911	0.446795	4.42958		246.063	0.398264	0.00393862	34.4574	0.0253576	34.7697	0.0467151	4.57882
a Isotopic dates calculated using lambda238 = 1.55125E-10 (Jaffey et al. 1971) and lambda235 = 9.8485E-10 (Jaffey et al. 1971).
b Corrected for initial Th/U disequilibrium using radiogenic 208Pb and Th/U[magma] specified.
c % discordance = 100 - (100 * (206Pb/238U date) / (207Pb/206Pb date))
d Th contents calculated from radiogenic 208Pb and 230Th-corrected 206Pb/238U date of the sample and assuming concordance between U-Pb Th-Pb systems.
e Th/U ratio of magma from which mineral crystallized.
f Total mass of radiogenic Pb.
g Total mass of common Pb.
h Ratio of radiogenic Pb (including 208Pb) to common Pb.
i Measured ratio corrected for fractionation and spike contribution only.
j Measured ratios corrected for fractionation and tracer and blank.

## Sheet: 10B Age
10B TIMS Age Data
	Dates (Ma)																Composition							Isotopic Ratios
Accepted	206Pb/238U	±2σ abs	206Pb/238U <Th>	±2σ abs	207Pb/235U	±2σ abs	207Pb/206Pb	±2σ abs	207Pb/206Pb <Th>	±2σ abs	Corr. Coeff	% disc		Modeled eruption age	±2σ abs		Th/U	Th/U (magma)	U (pg)	Pb* (pg)	Pbc (pg)	Pb*/Pbc		206Pb/204Pb	208Pb/206Pb	206Pb/238U	±2σ %	207Pb/235 U	±2σ %	207Pb/206Pb	±2σ %
	a		b		a		a		b			c					d	e		f	g	h		i	j	j			j		j
														23.2439	0.035387
10B L4 z4	23.2238	0.077644	23.3014	0.0789523	23.2207	1.14881	22.8941	118.01	14.8726	118.216	0.291174	-1.44041					1.21368	4.24	283.26	1.26388	0.316673	3.99112		224.977	0.388546	0.00360909	0.334932	0.0231324	5.00416	0.0465066	4.91698
10B L4 z5	23.2216	0.0416388	23.2991	0.0447619	23.415	0.54303	43.3213	54.9629	35.3284	55.0812	0.297449	46.3969					1.07574	3.76	967.119	4.18226	0.514743	8.12495		452.013	0.344384	0.00360874	0.179634	0.0233282	2.346	0.0469049	2.29874
10B L4 z9	23.4033	0.088387	23.4808	0.0902156	23.9959	1.31225	83.7784	128.739	75.9097	128.968	0.315816	72.0653					0.947613	3.31	212.486	0.899118	0.269732	3.33337		201.763	0.303356	0.00363703	0.378356	0.0239139	5.53351	0.0477085	5.42581
10B L4 z11	23.1729	0.0641445	23.2504	0.068274	23.1256	0.925037	18.2111	95.4075	10.1635	95.6048	0.298661	-27.2456					0.749659	2.62	530.506	2.11553	0.483626	4.37431		271.122	0.239997	0.00360116	0.277307	0.0230365	4.04579	0.046416	3.97166
10B L4 z13	23.274	0.0766078	23.3515	0.0783167	23.2512	1.11761	20.9003	114.542	12.8927	114.749	0.307713	-11.3571					1.06757	3.73	318.303	1.37655	0.341879	4.02642		233.873	0.341767	0.0036169	0.329751	0.0231632	4.86193	0.046468	4.77068
10B L4 z17	23.2173	0.121987	23.2949	0.122914	22.816	1.98315	-19.2778	210.049	-27.3698	210.409	0.233321	220.436					1.13797	3.98	613.307	2.68768	1.16629	2.30446		139.904	0.364309	0.00360808	0.526361	0.0227247	8.78994	0.0456997	8.68217
10B L5 z2	23.1753	0.0230678	23.2529	0.0287217	23.3827	0.129445	44.7656	12.4269	36.7556	12.5764	0.476421	48.2298					1.03464	3.62	4332.62	18.5212	0.485213	38.1712		2074.21	0.331233	0.00360153	0.0997152	0.0232957	0.559993	0.0469332	0.518924
10B L5 z3	23.1901	0.0668296	23.2677	0.0687477	22.9775	0.976513	0.782947	101.908	-7.28808	102.095	0.273092	-2861.9					1.0835	3.79	599.675	2.59288	0.57879	4.47982		257.293	0.346873	0.00360384	0.2887	0.0228873	4.29814	0.046081	4.2283
10B M4 z1	23.2122	0.075826	23.2897	0.0774513	22.726	1.10997	-28.4142	117.199	-36.5177	117.413	0.344947	181.692					1.09659	3.83	481.971	2.09142	0.505886	4.13417		238.301	0.351059	0.00360728	0.327253	0.0226341	4.93901	0.0455276	4.83578
10B M6 z1	23.2042	0.0368738	23.2817	0.0441837	23.4091	0.462978	44.4989	46.849	36.509	46.9981	0.292429	47.8544					0.731213	2.55	712.265	2.83217	0.320777	8.82908		530.425	0.23409	0.00360604	0.159196	0.0233223	2.00065	0.046928	1.95975
Rejected
Uncertainty >0.15 Ma
10B L2 z6	23.3036	0.35306	23.3813	0.353011	24.1523	1.93073	109.449	184.2	101.568	184.516	0.280692	78.7082					1.30896	4.58	1676.84	7.68336	2.41625	3.17987		173.291	0.420189	0.00362152	1.51778	0.0240715	8.08944	0.0482289	7.80057
10B S4 z5	24.7917	1.78118	24.8581	1.77706	46.0803	26.3951	1369.06	1094.82	1363.91	1096.05	0.295159	98.1891					1.36108	3.5	24.1245	0.121985	0.534203	0.228349		28.9759	0.43541	0.00385322	7.19838	0.0464277	58.5902	0.087427	56.8828
a Isotopic dates calculated using lambda238 = 1.55125E 10 (Jaffey et al. 1971) and lambda235 = 9.8485E 10 (Jaffey et al. 1971).
b Corrected for initial Th/U disequilibrium using radiogenic 208Pb and Th/U[magma] specified.
c % discordance = 100 (100 * (206Pb/238U date) / (207Pb/206Pb date))
d Th contents calculated from radiogenic 208Pb and 230Th corrected 206Pb/238U date of the sample and assuming concordance between U Pb Th Pb systems.
e Total mass of radiogenic Pb.
f Total mass of common Pb.
g Ratio of radiogenic Pb (including 208Pb) to common Pb.
h Th/U ratio of magma from which mineral crystallized.
i Measured ratio corrected for fractionation and spike contribution only.
j Measured ratios corrected for fractionation and tracer and blank.

## Sheet: 1C Age
1C TIMS Age Data
	Dates (Ma)																Composition							Isotopic Ratios
	206Pb/238U	±2σ abs	206Pb/238U <Th>	±2σ abs	207Pb/235U	±2σ abs	207Pb/206Pb	±2σ abs	207Pb/206Pb <Th>	±2σ abs	Corr. Coeff	% disc		Modeled eruption age	±2σ abs		Th/U	Th/U (magma)	U (pg)	Pb* (pg)	Pbc (pg)	Pb*/Pbc		206Pb/204Pb	208Pb/206Pb	206Pb/238U	±2σ %	207Pb/235 U	±2σ %	207Pb/206Pb	±2σ %
	a		b		a		a		b			c					d	e		f	g	h		i	j	j			j		j
Accepted
														23.2283	0.0632465
1C L4 z1	23.2095	0.0230904	23.287	0.0256817	23.4554	0.163223	48.7328	15.8692	40.7479	15.9422	0.456042	52.374					0.784928	2.74	1744.94	7.03428	0.25913	27.1458		1571.09	0.251286	0.00360686	0.099666	0.0233689	0.703954	0.0470114	0.663647
1C L4 z6	23.322	0.0402702	23.3996	0.0411031	23.6697	0.465293	59.1274	45.1175	51.1889	45.2067	0.58503	60.5563					1.01735	3.56	1005.75	4.31004	0.411043	10.4856		585.476	0.325687	0.00362438	0.172983	0.0235849	1.98877	0.0472167	1.8925
1C L4 z7	23.248	0.0760554	23.3255	0.076593	23.8542	1.13883	85.3806	112.395	77.463	112.592	0.311773	72.7713					0.87929	3.07	118.12	0.488414	0.123598	3.95164		239.323	0.281493	0.00361285	0.327739	0.023771	4.8304	0.0477409	4.73836
1C L4 z11	23.214	0.0343823	23.2916	0.0352929	23.5717	0.392307	60.2026	38.9218	52.2279	38.9978	0.379473	61.4402					1.07421	3.76	849.347	3.67135	0.313294	11.7185		643.765	0.343898	0.00360756	0.148377	0.0234861	1.68371	0.047238	1.63286
1C L4 z15	23.3154	0.0983139	23.3963	0.0984529	23.6604	1.48289	58.8557	148.518	50.5801	148.774	0.292309	60.3854					1.02265	4	397.718	1.70607	0.578731	2.94794		177.79	0.327429	0.00362335	0.422432	0.0235756	6.34071	0.0472113	6.23025
1C L5 z1	23.1802	0.0614344	23.2578	0.0619631	23.1307	0.892494	17.9808	92.1851	9.93183	92.3452	0.277258	-28.9163					1.0289	3.6	847.51	3.61749	0.735192	4.92046		284.06	0.329394	0.00360231	0.265506	0.0230417	3.9026	0.0464117	3.83734
1C L5 z4	23.1997	0.0390361	23.2773	0.0422287	23.1034	0.509353	13.09	52.5264	5.04113	52.6426	0.303831	-77.2331					1.09494	3.83	640.226	2.77716	0.310631	8.94039		493.595	0.350533	0.00360534	0.168564	0.0230142	2.22985	0.0463172	2.1843
1C L5 z5	23.145	0.0756741	23.2225	0.0780993	23.1985	1.12074	28.7491	115.254	20.7103	115.467	0.272482	19.4931					0.904848	3.16	959.475	3.97089	1.06268	3.73669		226.206	0.289681	0.00359682	0.327544	0.0231101	4.88649	0.0466203	4.80747
1C M2 z2	23.125	0.117081	23.2027	0.117086	24.3534	1.71802	147.335	163.857	139.454	164.163	0.330886	84.3044					0.792982	2.77	613.407	2.47385	0.792469	3.1217		189.869	0.254563	0.00359371	0.507203	0.0242744	7.13945	0.0490117	6.98795
1C M3 z2	23.2936	0.0345316	23.3712	0.0397009	23.3477	0.442114	28.9199	45.1085	20.9296	45.2308	0.264333	19.4547					0.903972	3.16	1204.77	5.01706	0.522782	9.59685		551.859	0.289392	0.00361996	0.148513	0.0232604	1.91546	0.0466236	1.88139
1C M4 z5	23.2849	0.0947493	23.3625	0.0962482	23.9006	1.4087	86.2721	138.549	78.3649	138.793	0.329318	73.0099					1.00418	3.51	258.512	1.10307	0.345908	3.18892		191.486	0.321473	0.0036186	0.407648	0.0238177	5.96363	0.0477586	5.84199
1C M4 z5a	23.3137	0.0971544	23.3912	0.0985844	24.4974	1.42968	142.228	135.592	134.416	135.83	0.342293	83.6082					1.01394	3.54	258.532	1.10799	0.341193	3.24741		194.106	0.324595	0.00362309	0.41748	0.0244196	5.90675	0.0489049	5.77709
1C M6 z6	23.2588	0.148004	23.3363	0.148923	23.5499	2.2595	53.3687	227.724	45.4096	228.112	0.286422	56.4187					0.99175	3.46	243.351	1.03368	0.535405	1.93066		123.639	0.317494	0.00361453	0.637484	0.0234641	9.70624	0.0471026	9.54316
Rejected
Interpretation: Pb loss
1C L5 z3	22.9024	0.0503087	22.98	0.0530968	22.8816	0.698633	20.7046	72.8548	12.5602	73.0013	0.276268	-10.6149					1.03402	3.62	1603.21	6.76938	1.1044	6.12945		348.865	0.33105	0.00355905	0.220056	0.0227908	3.08778	0.0464642	3.03419
Uncertainty >0.15 Ma
1C L2 z6	23.4606	1.30474	23.5392	1.3039	18.8692	20.5738	-533.945	2915.75	-542.939	2921.54	0.257322	104.394					1.10997	4	30.7041	0.134381	0.621132	0.216348		30.1483	0.356313	0.00364595	5.57154	0.0187571	110.05	0.0373292	108.75
1C L2 z7	23.0215	0.665149	23.1121	0.665126	23.1493	1.23239	36.4402	106.516	27.0128	106.739	0.563766	36.824					0.669442	4	1025.32	3.98366	0.799223	4.98441		301.535	0.215029	0.00357759	2.89442	0.0230604	5.38457	0.0467703	4.44942
1C L4 z3	23.2148	0.617029	23.2931	0.616678	22.4691	9.63726	-56.6275	1042.17	-64.8443	1043.95	0.253357	140.996					1.12064	4	517.769	2.25866	4.96076	0.455306		42.6966	0.358771	0.0036077	2.66269	0.0223754	43.3674	0.0450023	42.7704
1C L4 z9	22.9198	0.926893	23.0023	0.926151	15.8747	14.5591	-957.07	2686.77	-967.661	2693.34	0.251499	102.395					0.960541	4	163.03	0.669884	2.34747	0.285364		34.4393	0.307591	0.00356176	4.05127	0.0157571	92.4315	0.0321	91.4967
1C M4 z2	23.7562	0.646041	23.8358	0.645672	25.6959	9.92755	211.076	891.273	203.302	892.673	0.278058	88.7452					1.06864	4	109.154	0.483329	1.06767	0.452695		42.7545	0.342108	0.00369198	2.72448	0.0256295	39.1257	0.0503701	38.4573
1C M4 z6	23.2307	0.394115	23.3228	0.393682	21.2341	6.16355	-199.489	724.694	-209.432	726.22	0.265706	111.645					0.608594	4	352.573	1.35543	2.13988	0.633413		56.6485	0.194956	0.00361016	1.69959	0.0211326	29.3312	0.0424736	28.9261
1C S4 z2	24.5997	1.22904	24.6537	1.22566	41.7525	18.2773	1187.81	859.055	1183.47	859.976	0.288955	97.929					1.40901	2.8	38.6554	0.195049	0.593992	0.328369		33.6216	0.451761	0.00382331	5.00572	0.0419771	44.6815	0.0796648	43.4999
1C S4 z3	29.879	8.86382	29.9293	8.85131	109.674	123.569	2634.95	1894.21	2632.15	1895.74	0.284591	98.8661					1.87624	3.5	27.4324	0.195357	3.05496	0.0639474		20.7593	0.599453	0.00464573	29.7346	0.114062	118.863	0.178147	114.022
a Isotopic dates calculated using lambda238 = 1.55125E-10 (Jaffey et al. 1971) and lambda235 = 9.8485E-10 (Jaffey et al. 1971).
b Corrected for initial Th/U disequilibrium using radiogenic 208Pb and Th/U[magma] specified.
c % discordance = 100 - (100 * (206Pb/238U date) / (207Pb/206Pb date))
d Th contents calculated from radiogenic 208Pb and 230Th-corrected 206Pb/238U date of the sample and assuming concordance between U-Pb Th-Pb systems.
e Th/U ratio of magma from which mineral crystallized.
f Total mass of radiogenic Pb.
g Total mass of common Pb.
h Ratio of radiogenic Pb (including 208Pb) to common Pb.
i Measured ratio corrected for fractionation and spike contribution only.
j Measured ratios corrected for fractionation and tracer and blank.

## Sheet: AGQM Age
AGQM TIMS Age Data			Pamukçu, A.S., Schoene, B., Deering, C.D., Keller, C.B., and Eddy, M.P., 2022, Volcano-pluton connections at the Lake City magmatic center (Colorado, USA): Geosphere, v. 18, https://doi.org/10.1130/GES02467.1.
	Dates (Ma)																Composition							Isotopic Ratios
	206Pb/238U	±2σ abs	206Pb/238U <Th>	±2σ abs	207Pb/235U	±2σ abs	207Pb/206Pb	±2σ abs	207Pb/206Pb <Th>	±2σ abs	Corr. Coeff	% disc		Modeled eruption age	±2σ abs		Th/U	Th/U (magma)	U (pg)	Pb* (pg)	Pbc (pg)	Pb*/Pbc		206Pb/204Pb	208Pb/206Pb	206Pb/238U	±2σ %	207Pb/235 U	±2σ %	207Pb/206Pb	±2σ %
	a		b		a		a		b			c					d	e		f	g	h		i	j	j			j		j
Accepted
														23.132	0.0376993
AGQM L2 z3	23.1137	0.0495617	23.1915	0.0503988	23.5986	0.715055	73.2756	71.3814	65.2747	71.5202	0.324611	68.4565					0.877052	3.07	1415.91	5.81995	0.76653	7.59259		427.854	0.281553	0.00359195	0.21481	0.0235133	3.06542	0.0474981	3.00239
AGQM L2 z4	23.1296	0.0617867	23.2073	0.0626221	23.2104	0.905877	31.5905	92.711	23.5337	92.8957	0.323768	26.783					0.751744	2.63	824.645	3.28641	0.564897	5.81772		342.144	0.241325	0.00359442	0.267612	0.023122	3.94767	0.0466757	3.86918
AGQM L5 z1	23.1191	0.0252068	23.1967	0.0327538	23.5432	0.241529	67.0647	23.8903	59.071	24.0307	0.35957	65.5271					0.849437	2.97	904.361	3.69073	0.18018	20.4836		1171.28	0.271943	0.0035928	0.109225	0.0234575	1.03783	0.0473741	1.00322
AGQM L5 z6	23.1222	0.0334017	23.1998	0.0392944	23.3985	0.403916	51.884	40.7656	43.8638	40.8923	0.303415	55.4349					0.853903	2.99	1451.37	5.92897	0.562522	10.54		611.22	0.273373	0.00359327	0.144717	0.0233116	1.74621	0.0470733	1.70757
AGQM L5 z8	23.0817	0.0608898	23.1593	0.0649222	22.9829	0.900346	12.6575	93.7305	4.56723	93.9227	0.273903	-82.3558					0.780566	2.73	777.144	3.11053	0.679333	4.5788		280.914	0.249896	0.00358696	0.264274	0.0228928	3.96197	0.0463089	3.89775
AGQM L5 z13	23.3292	0.0445229	23.4067	0.0500287	23.2248	0.652575	12.4309	67.2733	4.42579	67.43	0.264939	-87.6701					0.774744	2.71	842.635	3.4039	0.540984	6.29205		379.581	0.248021	0.00362549	0.191192	0.0231365	2.84208	0.0463045	2.79732
AGQM L5 z16	23.0592	0.0984954	23.1368	0.0990827	22.5885	1.51217	-27.2342	161.767	-35.3967	162.053	0.246999	184.67					0.734235	2.57	88.1719	0.348293	0.13341	2.61069		170.01	0.235065	0.00358347	0.427906	0.0224956	6.76917	0.04555	6.67628
AGQM L5 z17	23.0758	0.020523	23.1534	0.0300778	23.2649	0.256091	42.8424	26.2229	34.8	26.3667	0.22577	46.1379					0.810098	2.83	1115.35	4.4979	0.270724	16.6143		962.972	0.259351	0.00358605	0.0890967	0.0231769	1.11342	0.0468955	1.09627
AGQM L z3	23.1733	0.150157	23.2509	0.149889	24.4842	2.23103	155.145	211.422	147.291	211.808	0.329208	85.0635					0.844272	2.95	966.124	3.95467	1.63382	2.42051		149.589	0.271026	0.00360122	0.649141	0.0244063	9.22243	0.0491753	9.0295
AGQM L z7	23.0687	0.0301817	23.1464	0.0324302	23.4776	0.416049	65.5552	41.7901	57.5305	41.8888	0.318665	64.8103					0.729281	2.55	4633.54	18.3228	1.46259	12.5276		719.513	0.234117	0.00358494	0.131068	0.0233913	1.79267	0.0473442	1.755
AGQM L z8	23.1377	0.0716251	23.2153	0.0719661	23.8424	1.05108	95.4851	103.492	87.5311	103.682	0.318936	75.7683					0.970124	3.39	2433.94	10.245	1.94431	5.26924		296.068	0.311429	0.00359568	0.310116	0.0237591	4.46041	0.0479449	4.37127
AGQM M z3	23.2706	0.0926466	23.3483	0.0931194	24.265	1.37414	123.913	132.254	116.043	132.513	0.320569	81.2203					0.648873	2.27	3388.65	13.2555	3.5524	3.73143		231.125	0.208296	0.00361637	0.398847	0.0241852	5.731	0.0485256	5.61577
AGQM M z7	23.288	0.0285058	23.3656	0.0325069	23.7	0.387229	65.698	38.5391	57.7566	38.6502	0.313246	64.553					0.561869	1.96	1846.12	7.0583	0.53795	13.1207		785.146	0.180365	0.00361908	0.122627	0.0236155	1.65302	0.0473471	1.61847
AGQM M z10	23.2277	0.067283	23.3053	0.0682767	24.0903	0.979803	111.029	95.1513	103.132	95.3432	0.324878	79.0796					0.65614	2.29	724.54	2.83368	0.538526	5.26192		318.016	0.21063	0.0036097	0.290189	0.024009	4.11565	0.0482611	4.03059
AGQM M z11	23.2362	0.0139879	23.3139	0.0204153	23.4956	0.121502	50.1167	12.1573	42.1277	12.2776	0.286182	53.6358					0.597925	2.09	4918.69	18.9374	0.442081	42.8369		2499.48	0.191942	0.00361102	0.0603073	0.0234094	0.523134	0.0470387	0.508117
Rejected
Interpretation: xenocryst/detrital
AGQM L5 z5	15.686	0.0679167	15.7637	0.0719373	15.5118	1.04413	-11.4352	161.538	-23.3947	161.993	0.251141	237.173					0.73793	2.58	1331.06	3.58011	1.37913	2.59592		168.923	0.236714	0.00243625	0.433503	0.0153941	6.78274	0.0458482	6.68697
AGQM L z9	25.3667	0.0667492	25.4443	0.067471	24.7438	0.996575	-35.3583	97.6164	-42.793	97.7747	0.236974	171.742					0.867573	3.03	971.62	4.36635	0.965654	4.52165		272.201	0.278393	0.00394276	0.263656	0.0246683	4.07685	0.0453976	4.0224
AGQM M z14	24.7786	0.0203879	24.8562	0.0230447	24.8602	0.210109	32.7546	20.0703	25.2406	20.1295	0.261035	24.3508					0.827275	2.89	3159.33	13.7454	0.647302	21.2349		1220.09	0.265489	0.00385118	0.0824384	0.0247857	0.855553	0.0466984	0.837185
Uncertainty >0.15 Ma
AGQM L2 z9	22.8651	0.444621	22.9532	0.444215	20.8753	6.93007	-202.826	830.394	-212.49	832.084	0.241571	111.273					0.762597	4	3693.94	14.5455	25.6906	0.566179		51.2848	0.244933	0.00355325	1.94799	0.0207718	33.5399	0.0424173	33.1233
a Isotopic dates calculated using lambda238 = 1.55125E 10 (Jaffey et al. 1971) and lambda235 = 9.8485E 10 (Jaffey et al. 1971).
b Corrected for initial Th/U disequilibrium using radiogenic 208Pb and Th/U[magma] specified.
c % discordance = 100 (100 * (206Pb/238U date) / (207Pb/206Pb date))
d Th contents calculated from radiogenic 208Pb and 230Th corrected 206Pb/238U date of the sample and assuming concordance between U Pb Th Pb systems.
e Total mass of radiogenic Pb.
f Total mass of common Pb.
g Ratio of radiogenic Pb (including 208Pb) to common Pb.
h Th/U ratio of magma from which mineral crystallized.
i Measured ratio corrected for fractionation and spike contribution only.
j Measured ratios corrected for fractionation and tracer and blank.
