# Supplementary material
Source: publisher figshare collection journal article supplement (https://gsapubs.figshare.com/articles/dataset/_/19783009)
Supplement: Supplementary file 1 [file 1]

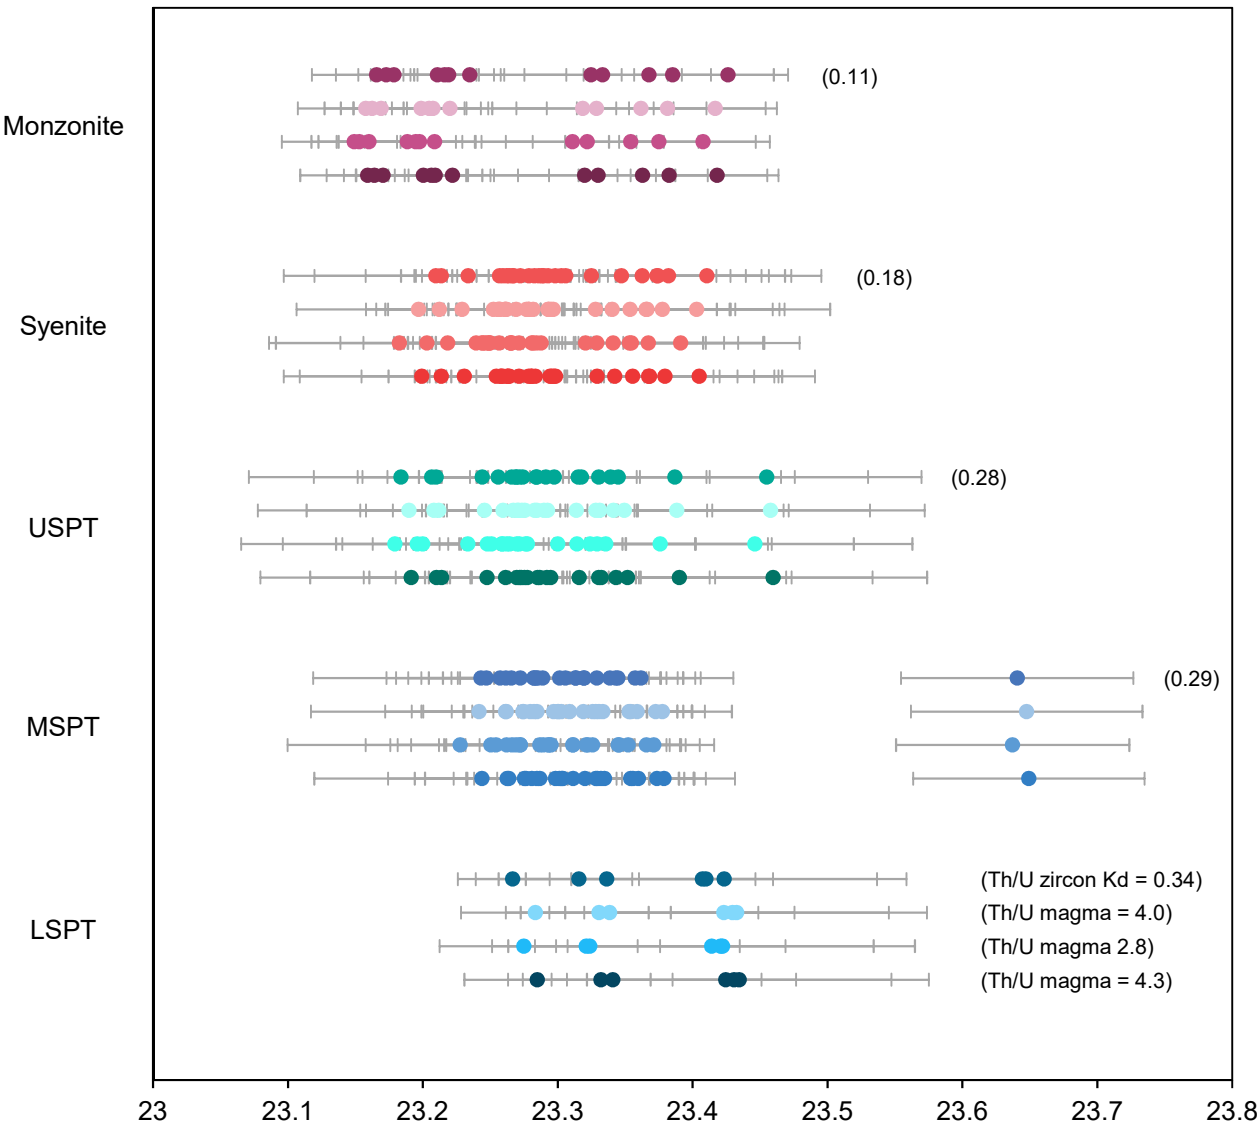

Figure S1. Comparison of TIMS ages calculated from different values of Th/U<sub>magma</sub> for each unit of the SPT and the post-caldera intrusions. For each unit, the uppermost results have been calculated using a single zircon partition coefficient for Th and U (shown in parenthesis to the right of the results) calculated from Claiborne et al. (2016). All other results were calculated using a single value for Th/U magma; the value used is shown in parentheses to the right of the LSPT; these values were used in the same succession for all other samples.

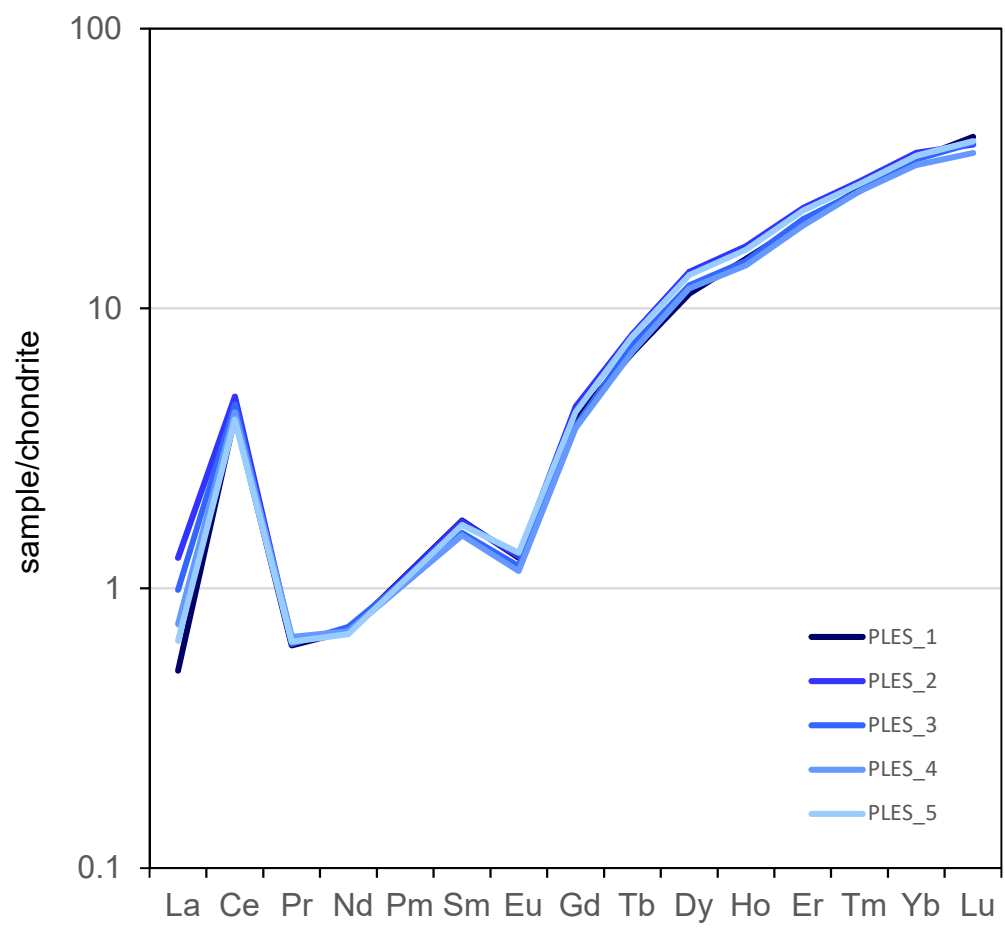

Figure S2. Plot of REEs determined from the Plesovice solution analyzed during one analysis session. The Plesovice zircon solution was analyzed 5 times for every batch of 20 unknowns.



Figure S3. CL images of zircon grains analyzed in this study. Names labeled in blue are high-Hf grains.

48C

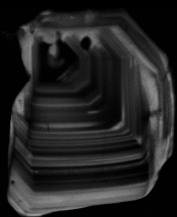

M4 z8

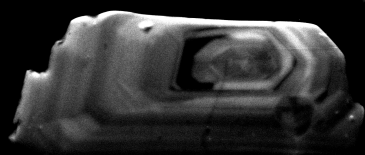

L4 z10

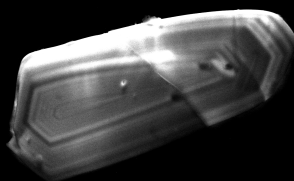

L4 z11

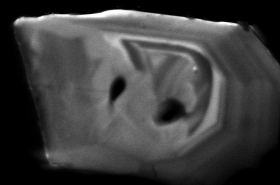

L4 z2

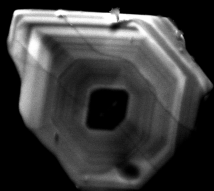

L4 z4

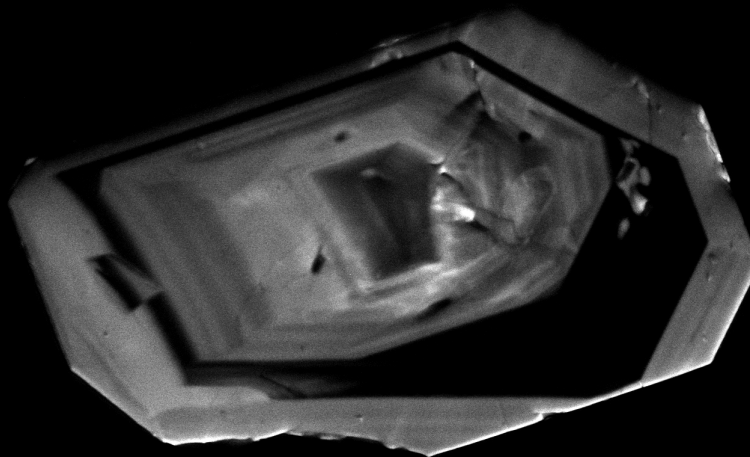

L5 z1

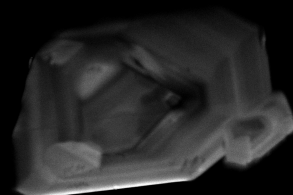

L5 z2

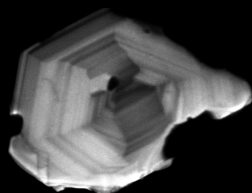

S4 z17

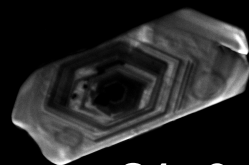

S4 z6

50  $\mu$ m

# SPM

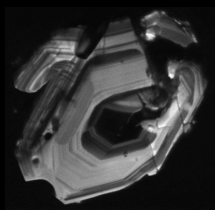

M4 z13

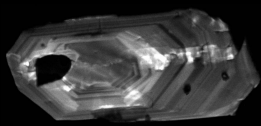

M4 z6

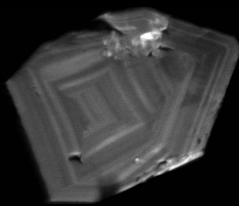

M4 z5

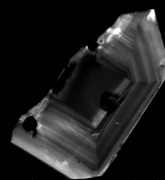

M4 z3

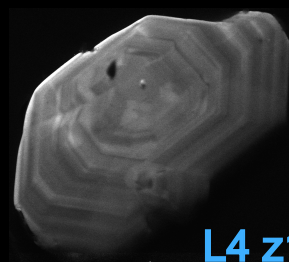

L4 z1

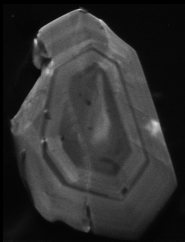

L4 z2

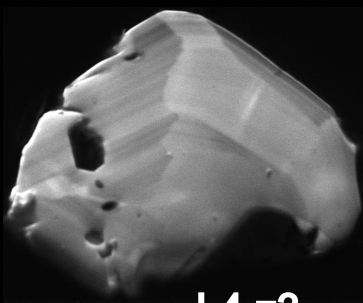

L4 z3

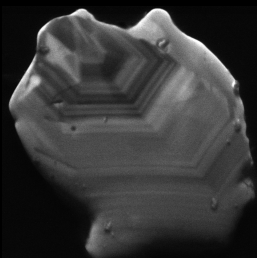

L4 z6

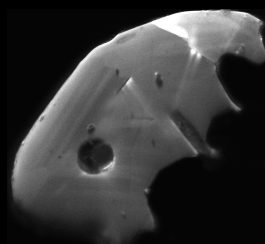

L4 z7

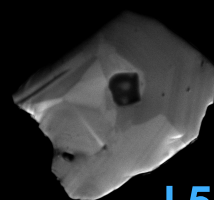

L5 z1

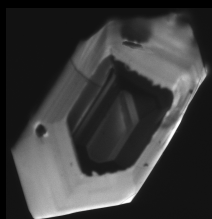

L5 z20

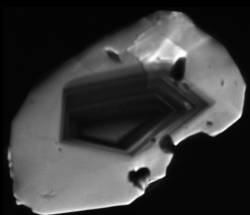

L5 z7

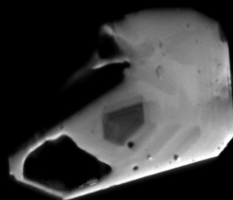

L5 z9

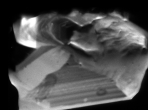

L5 z8

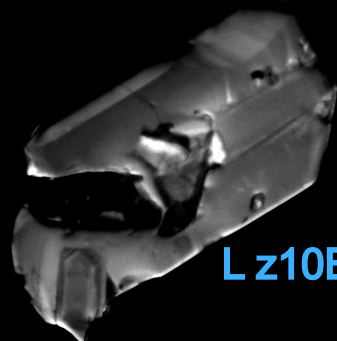

L z10B

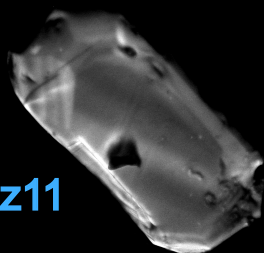

L z11

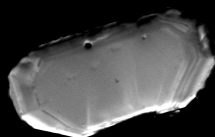

L z12

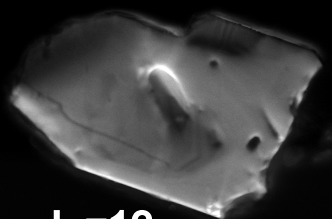

L z13

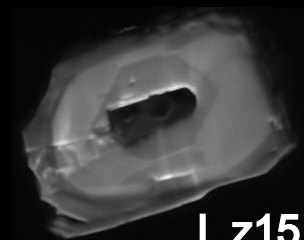

L z15

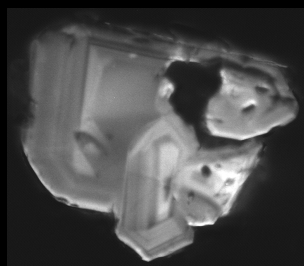

L z19

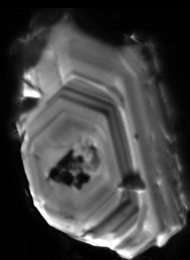

L z3

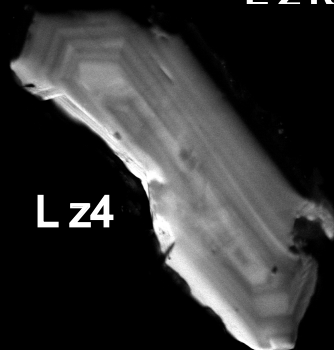

L z4

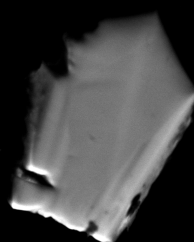

L z5

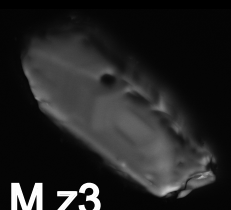

M z3

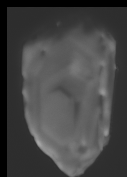

M z6

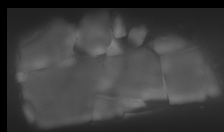

S z10

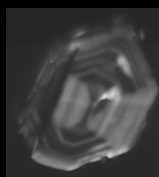

S z12

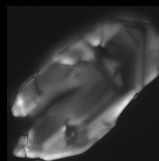

S z14

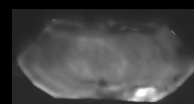

S z1

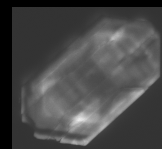

S z4

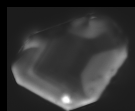

S z9

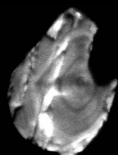

S2 z21

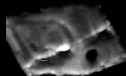

S2 z8

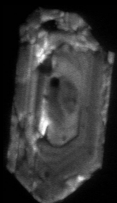

S2 z6

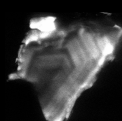

S2 z4

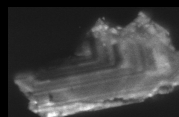

S2 z1

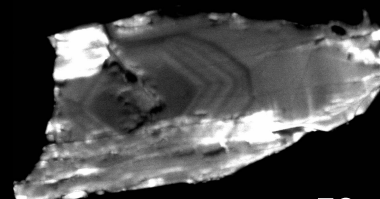

S2 z12

50  $\mu$ m

# 40B

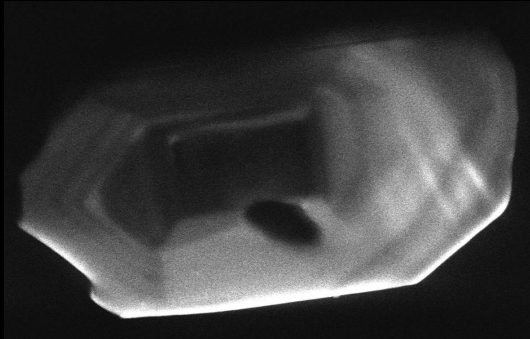

M6 z2

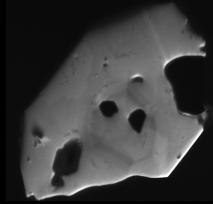

L5 z11

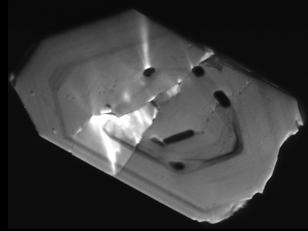

L5 z10

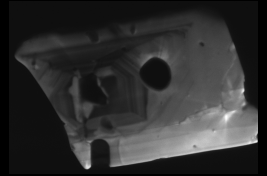

L5 z19

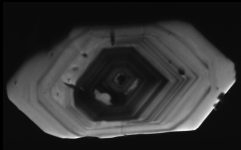

L5 z16

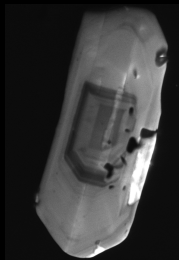

L5 z18

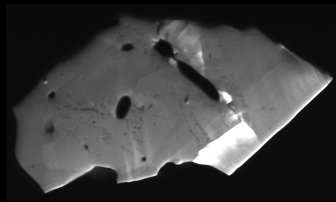

L5 z8

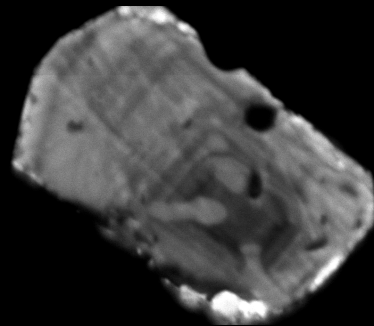

S2 z12

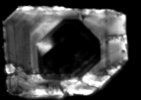

S2 z13

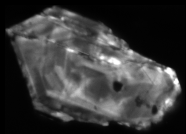

S2 z17

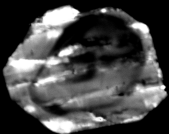

S2 z2

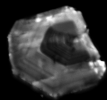

S2 z22

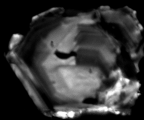

S2 z24

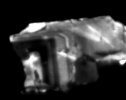

S2 z5

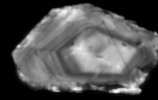

S2 z8

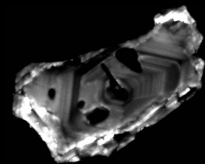

M2 z3

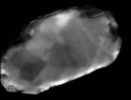

M2 z1

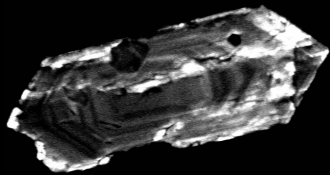

L2 z7

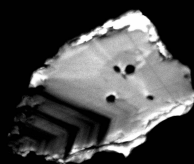

L2 z6

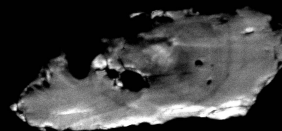

L2 z1

50  $\mu$ m

# SPU

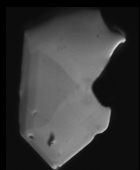

L5 z12

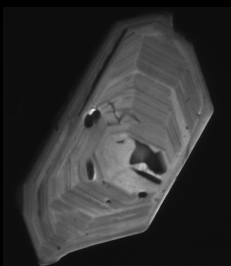

L5 z18

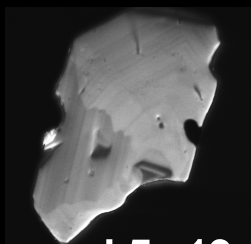

L5 z19

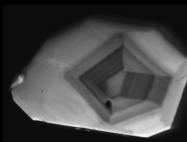

L5 z21

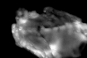

S2 z1

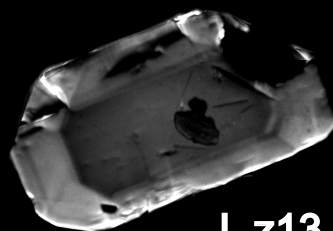

L z13

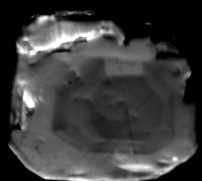

L z15

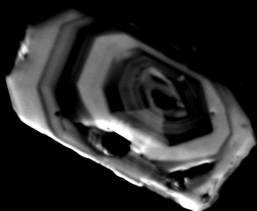

L z19

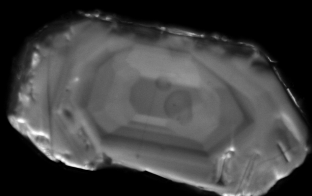

L z1

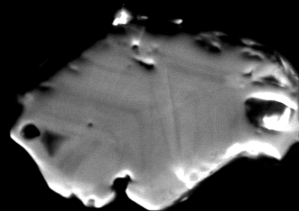

L z20

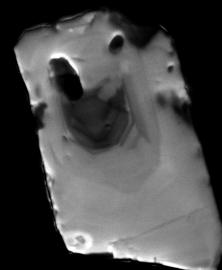

L z7

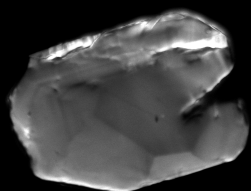

L z8

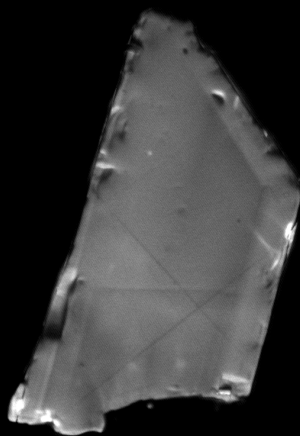

L z9

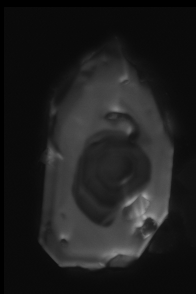

M z14

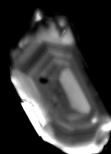

M z1

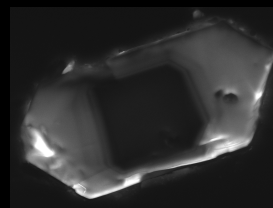

M z20

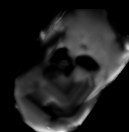

M z3

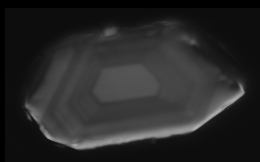

M z9

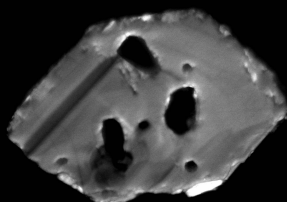

L2 z5

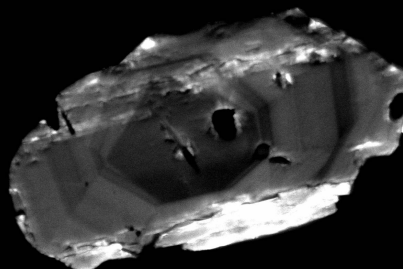

L2 z7

50  $\mu$ m



# SY2A

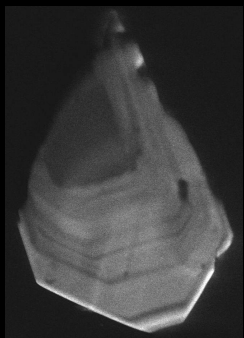

M6 z5

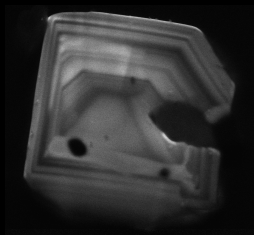

L4 z12

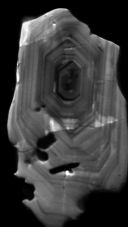

L4 z3

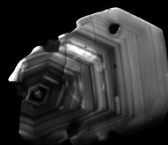

L4 z4

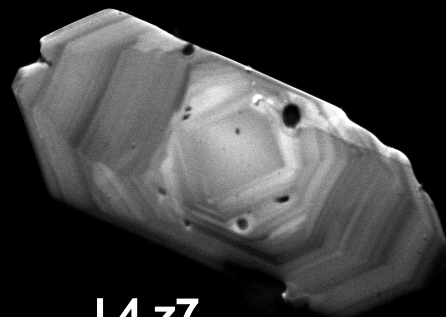

L4 z7

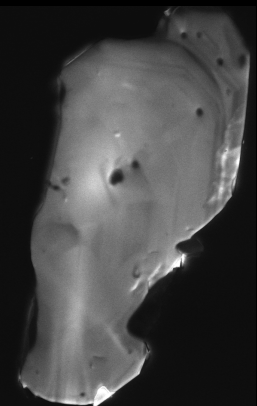

L5 z2

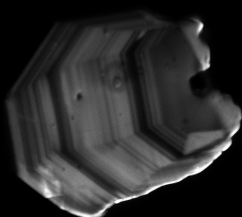

L5 z4

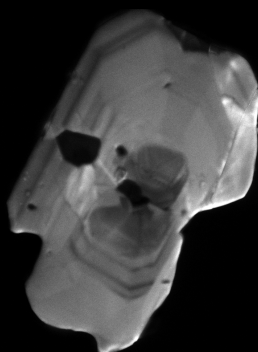

L5 z5

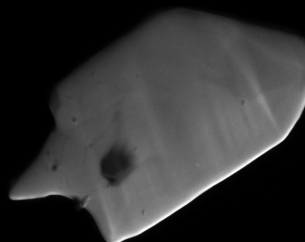

L5 z8

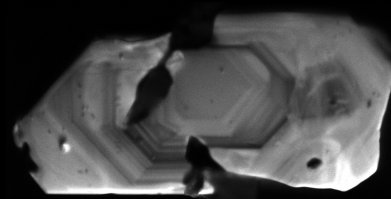

L5 z9

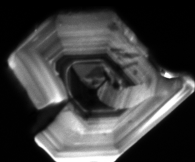

S4 z1

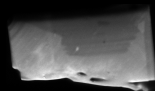

S4 z2

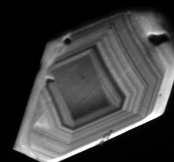

S4 z5

50  $\mu$ m

10B

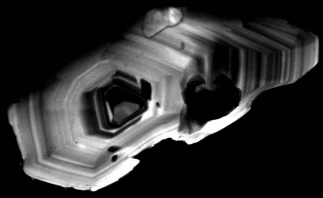

M4 z1

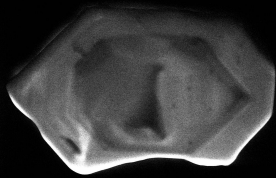

M6 z1

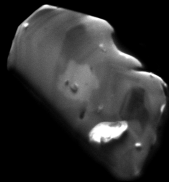

L4 z13

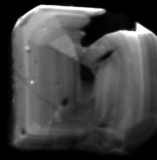

L4 z17

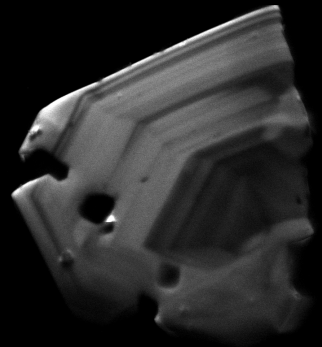

L4 z6

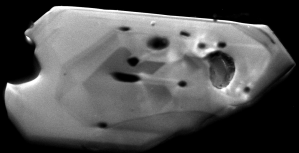

L4 z7

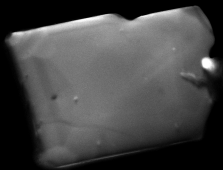

L4 z9

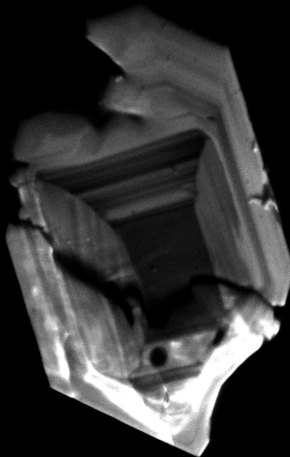

L5 z2

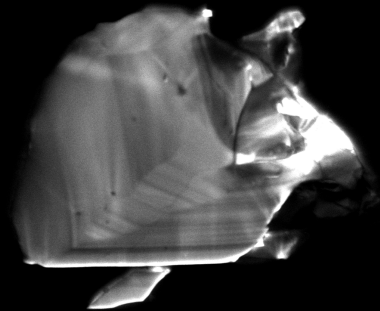

L5 z3

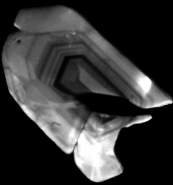

S4 z5

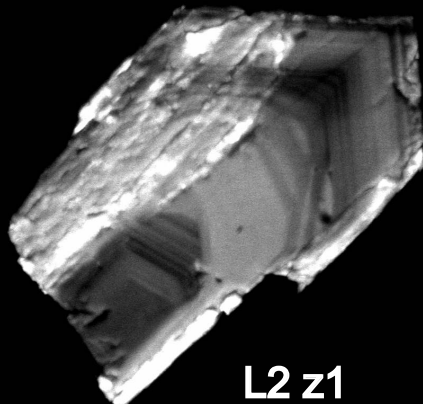

L2 z1

50  $\mu$ m

1C

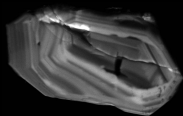

M4 z2

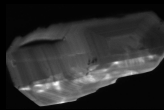

M4 z6

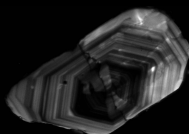

M4 z5

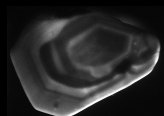

M6 z6

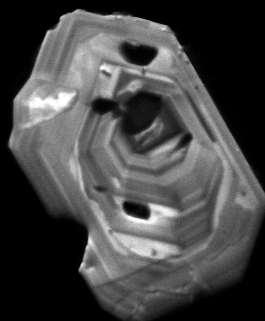

L4 z1

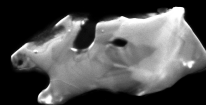

L4 z11

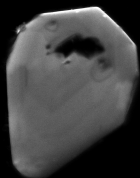

L4 z15

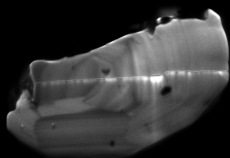

L4 z16

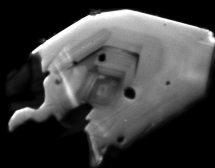

L4 z3

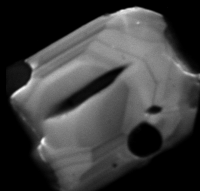

L4 z6

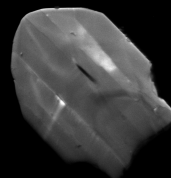

L4 z5

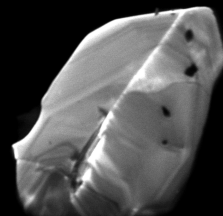

L4 z9

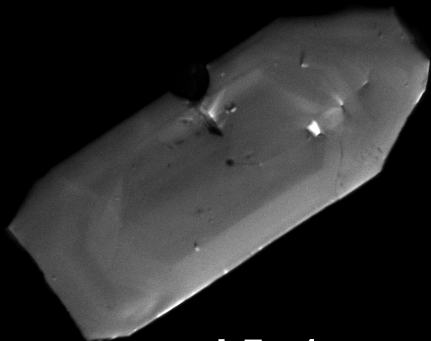

L5 z1

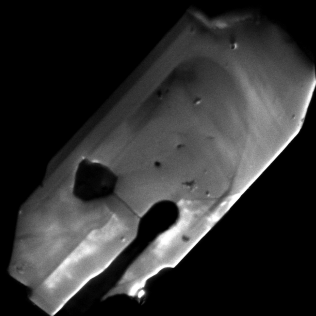

L5 z4

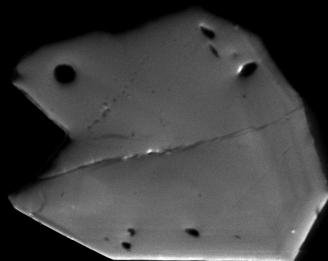

L5 z5

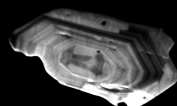

S4 z2

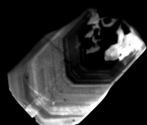

S4 z3

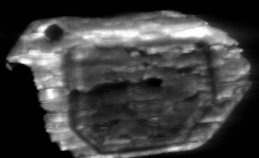

L2 z7

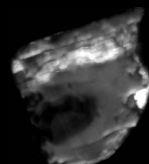

L2 z6

50  $\mu$ m



# AGQM

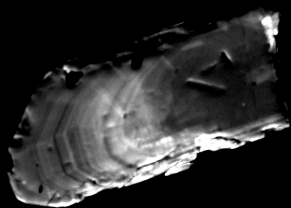

L z3

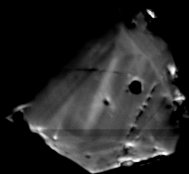

L z7

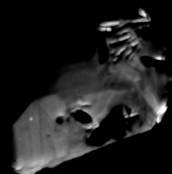

L z8

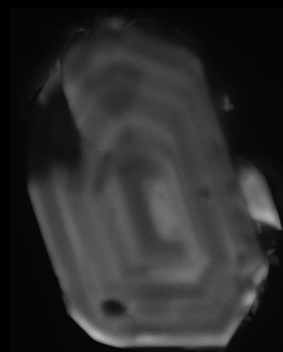

M z10

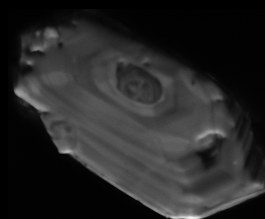

M z11

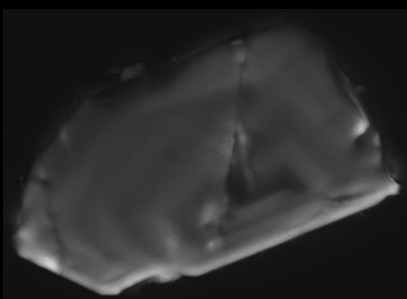

M z17

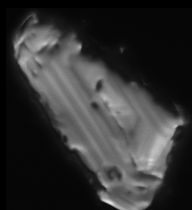

M z3

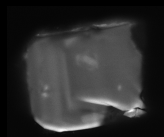

M z5

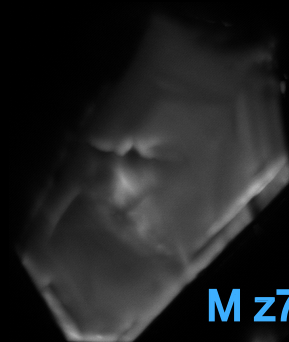

M z7

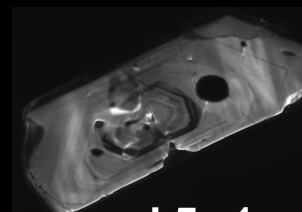

L5 z1

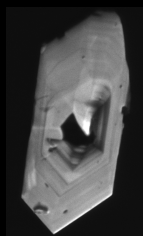

L5 z13

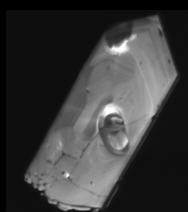

L5 z17

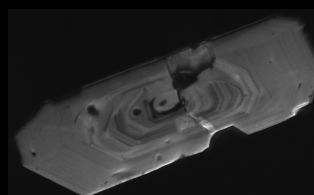

L5 z6

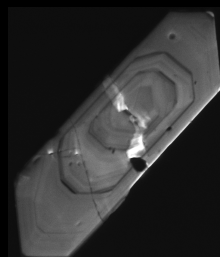

L5 z8

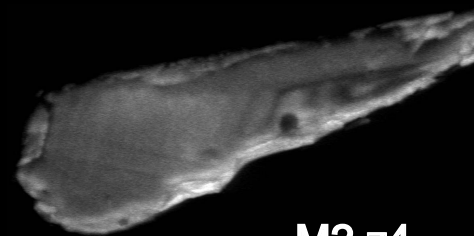

M2 z4

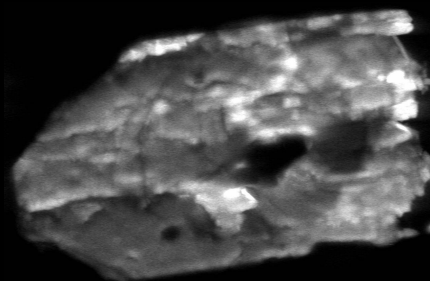

M2 z2

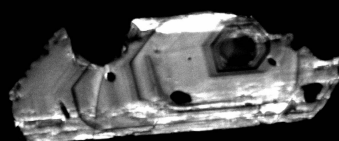

M2 z3

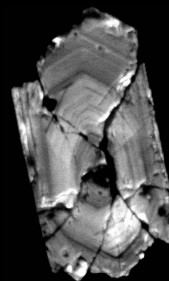

M2 z4

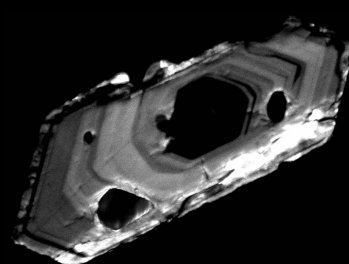

M2 z9

50  $\mu$ m

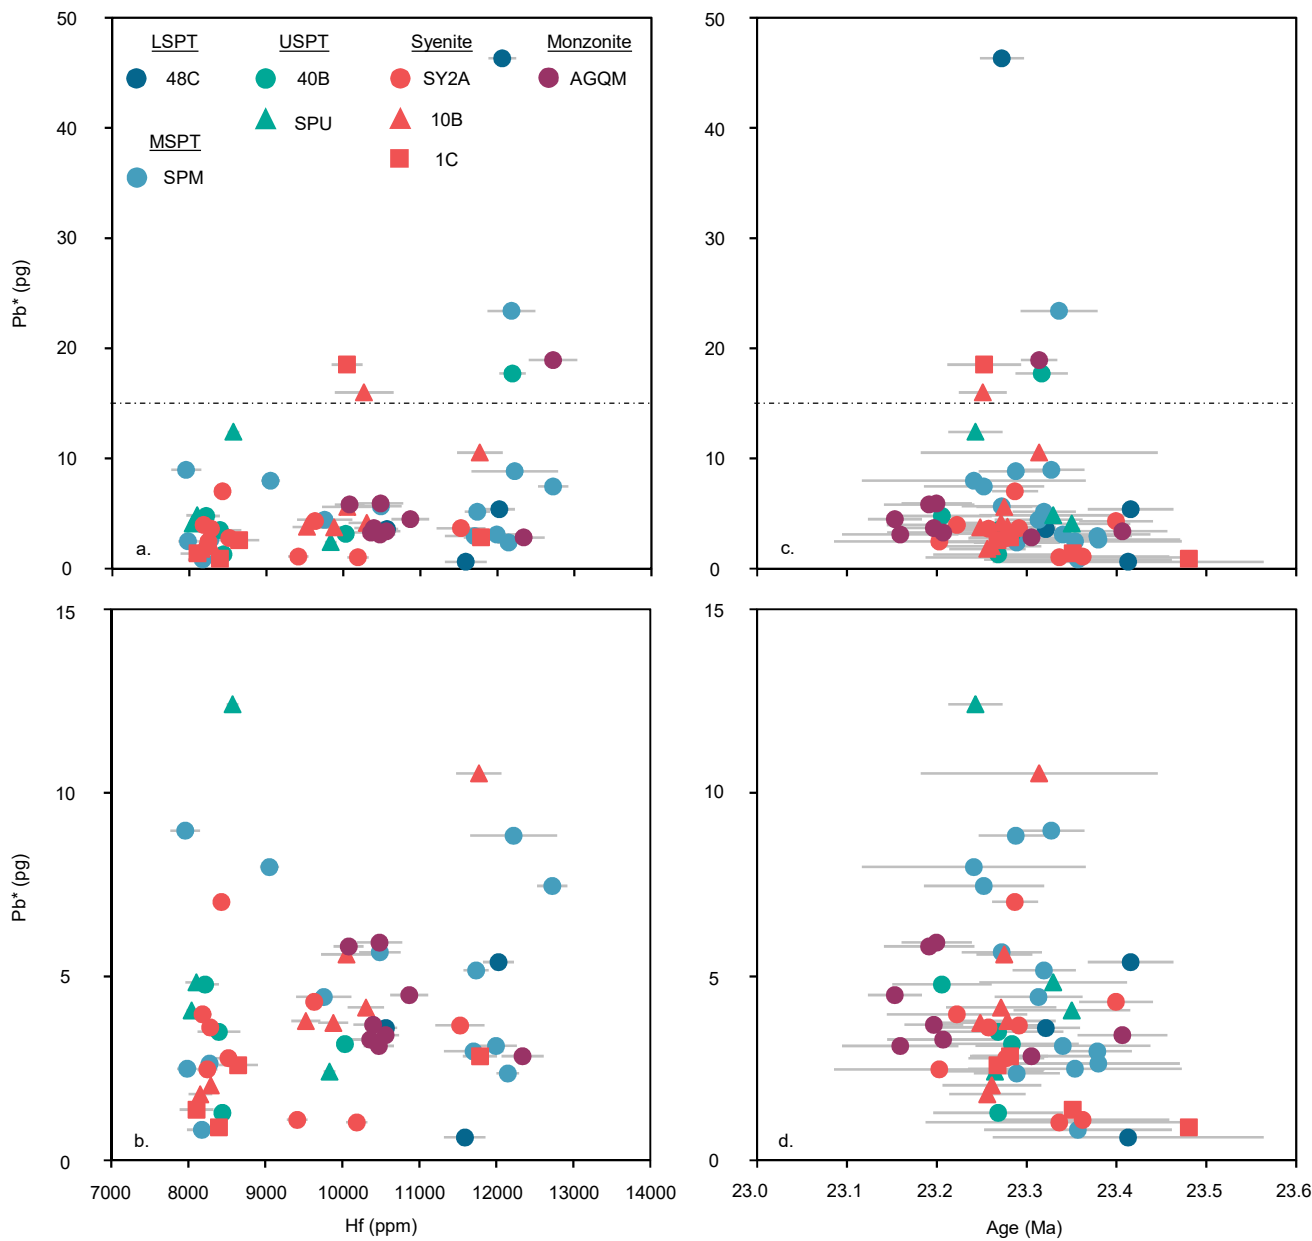

Figure S4. Zircon radiogenic Pb contents (Pb\*) vs. (a, b) Hf and (c, d) age. Plots in (b) and (d) are zoomed in region below dashed lines in (a) and (c). There is no relationship between zircon Pb\* and Hf or age in any of the samples.

Supplemental Material 2.

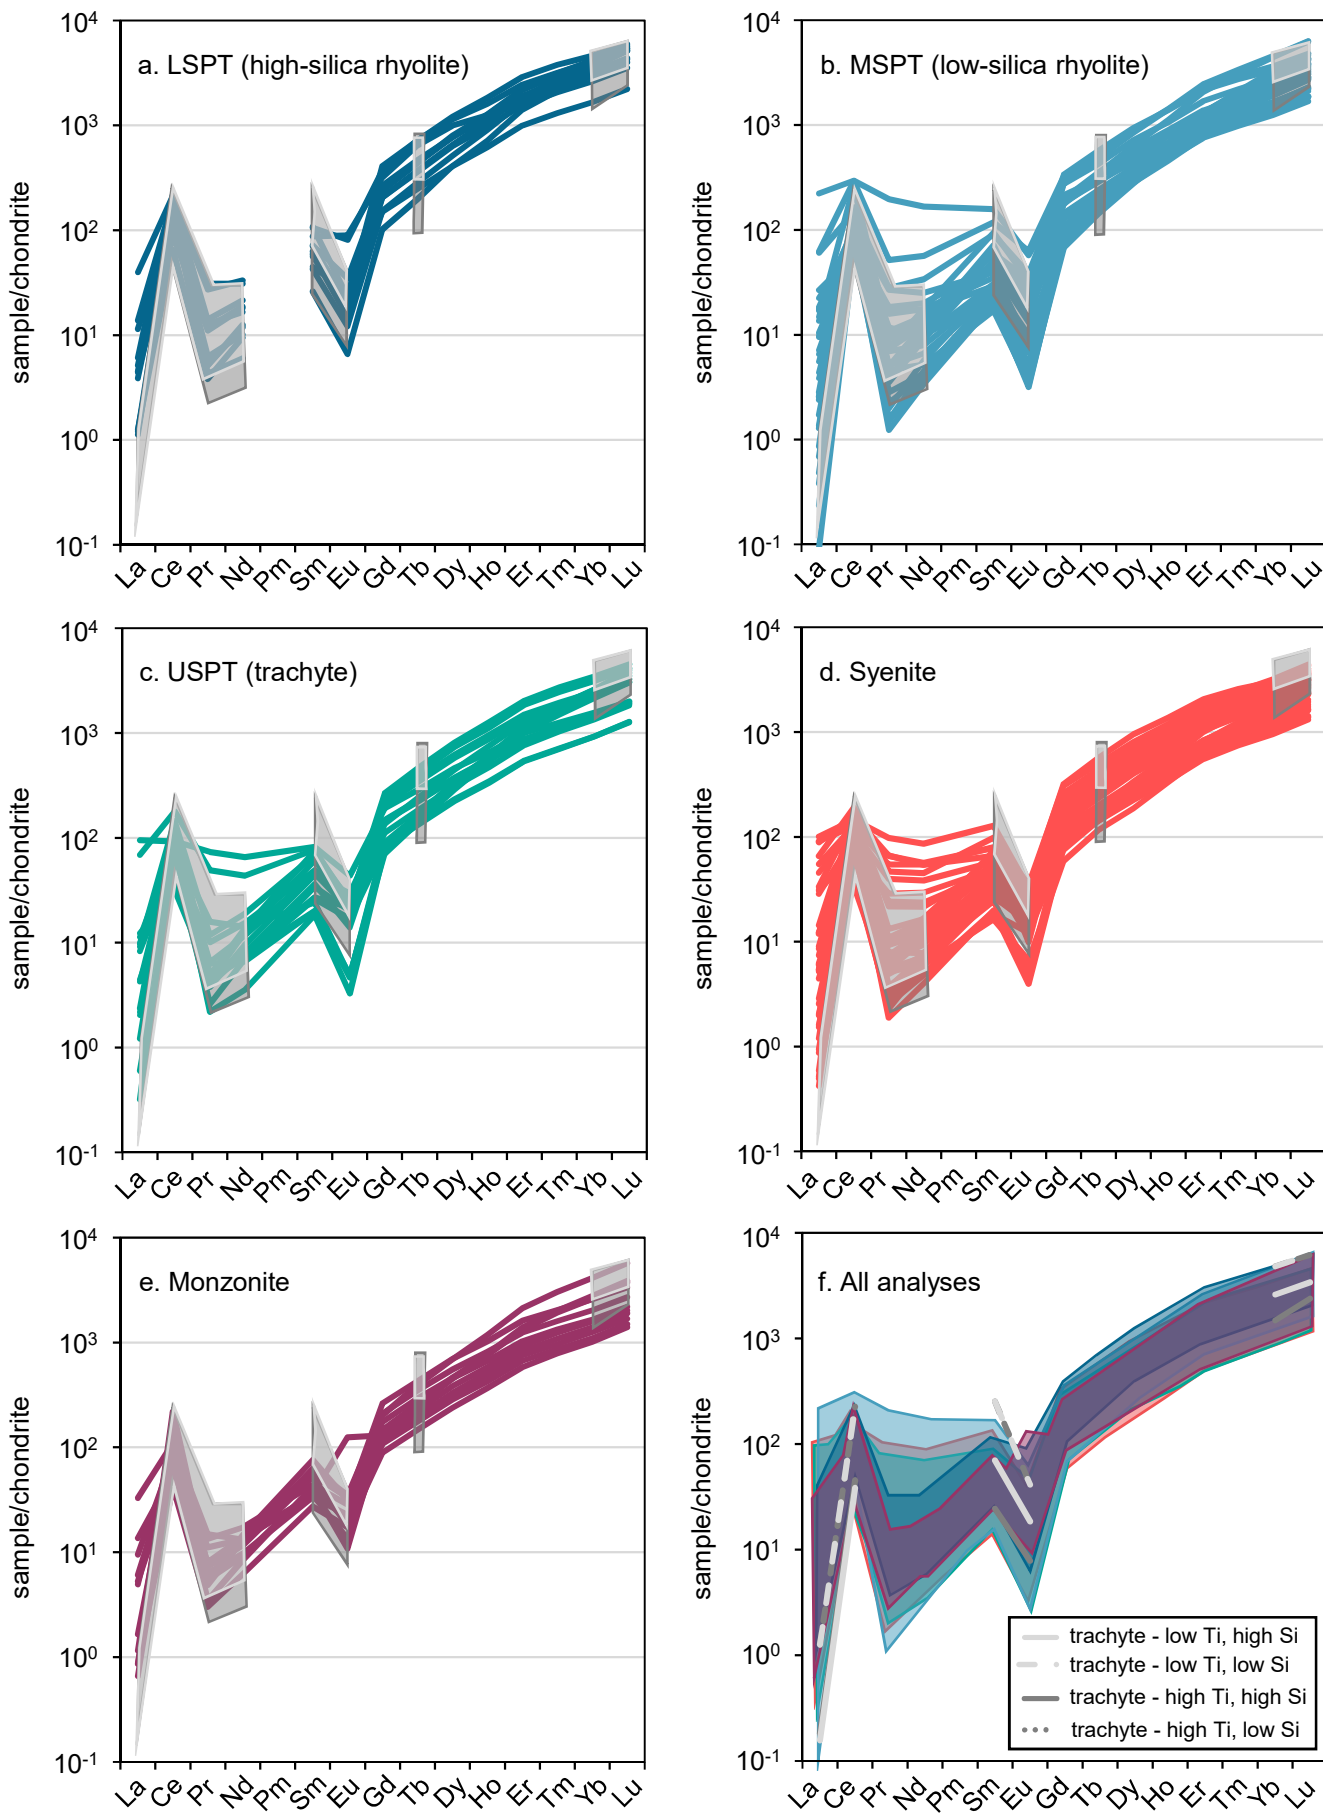

Figure S5. Zircon REE from TIMS-TEA and trace element modeling from a trachyte parent melt (1Tspupa; Kennedy et al. 2016) for each sample. Fields on each plot cover simulation results for a range of melt SiO<sub>2</sub> contents (SiO<sub>2</sub> at zircon saturation to 77 wt. % SiO<sub>2</sub>) for max (dark gray) and min (light gray) melt TiO<sub>2</sub> availability. REE patterns for maximum and minimum Ti availability and melt SiO<sub>2</sub> are shown in panel (f).

Supplemental Material 2.

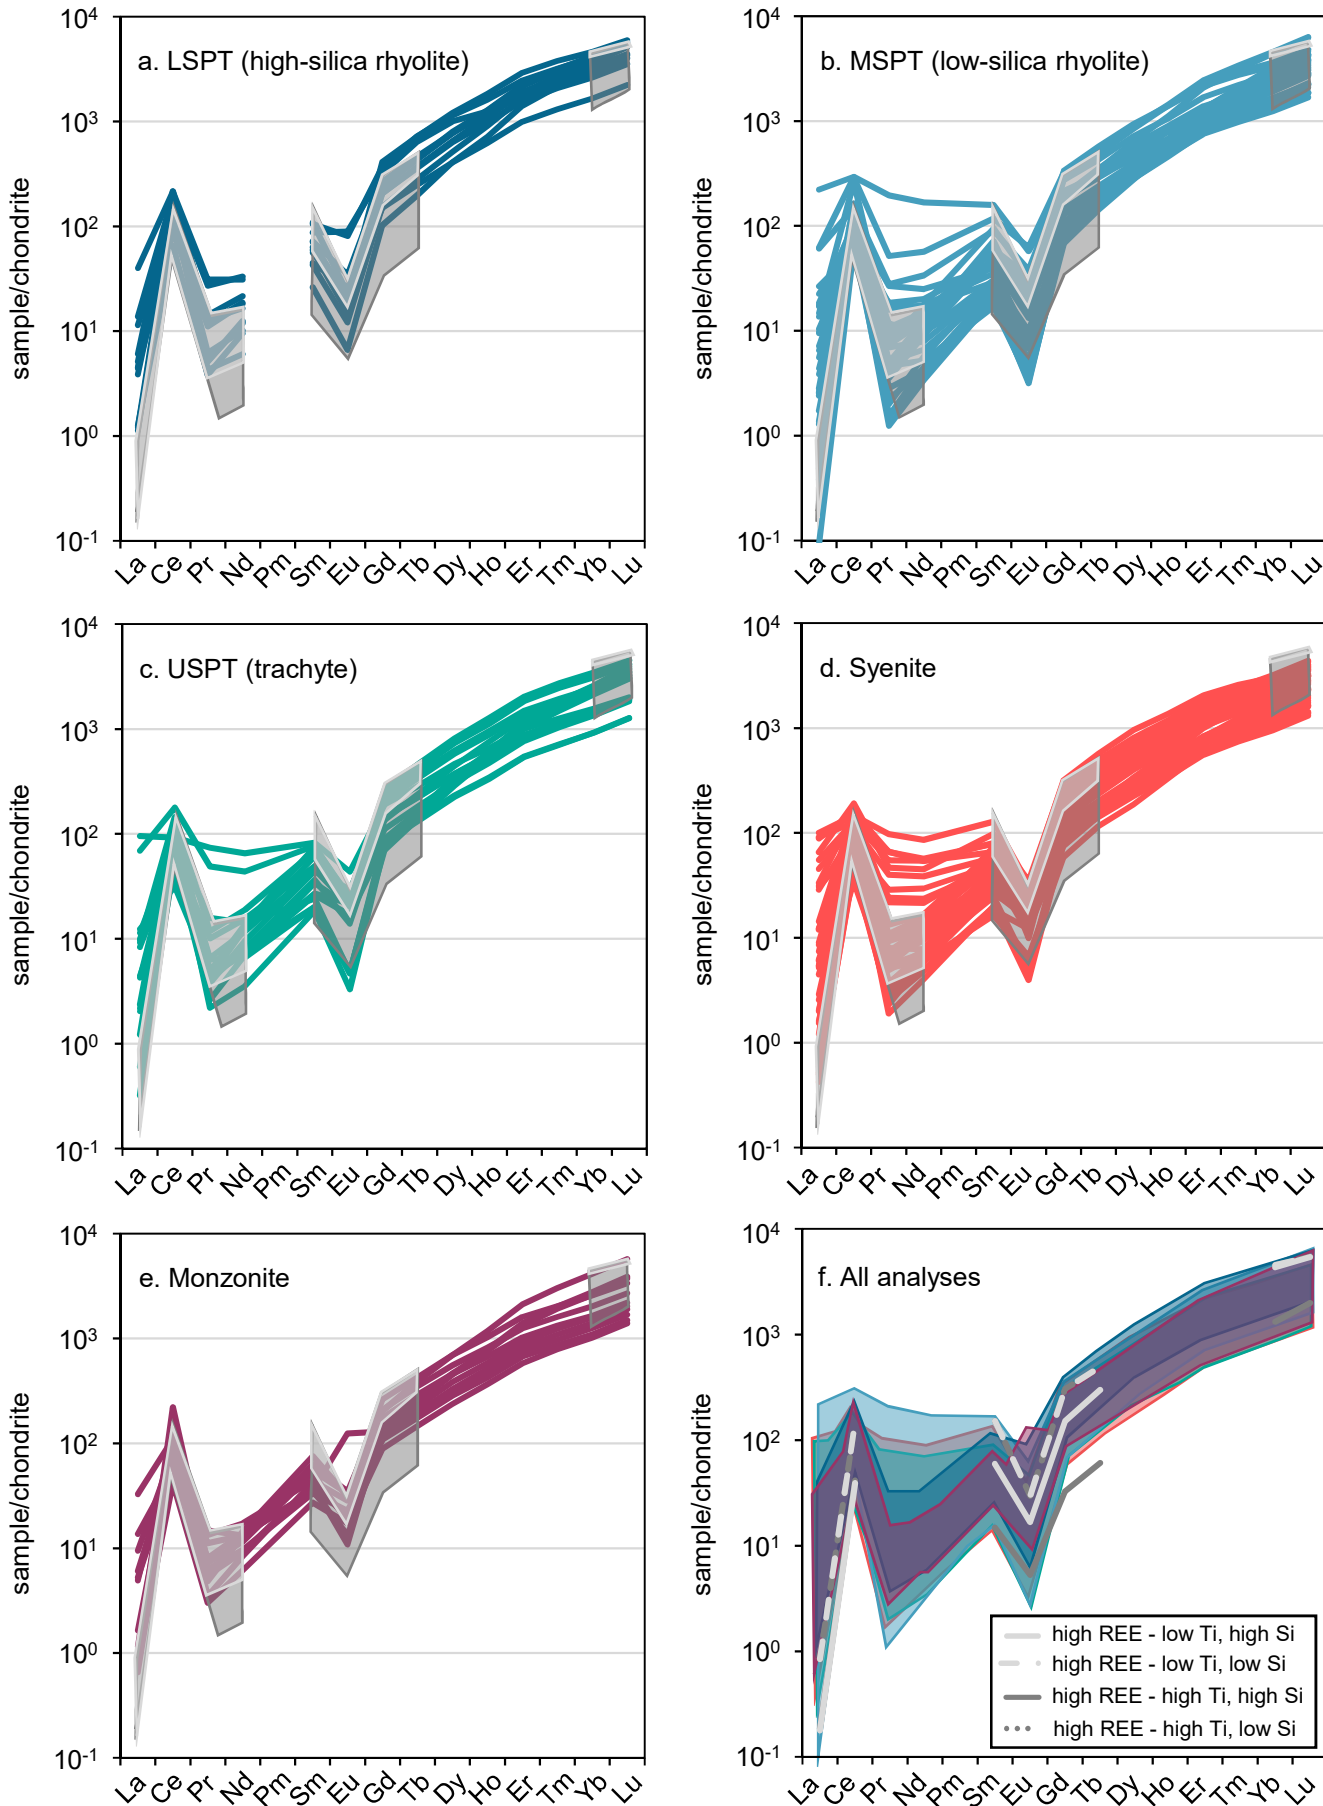

Figure S6. Zircon REE from TIMS-TEA and trace element modeling from a high-REE trachyte parent melt (4Tspup; Kennedy et al. 2016) for each sample. Fields on each plot cover simulation results for a range of melt  $\text{SiO}_2$  contents ( $\text{SiO}_2$  at zircon saturation to 77 wt. %  $\text{SiO}_2$ ) for max (dark gray) and min (light gray) melt  $\text{TiO}_2$  availability. REE patterns for maximum and minimum Ti availability and melt  $\text{SiO}_2$  are shown in panel (f).
